# Supplementary material
Source: PubMed Central journal article supplement (PMC7078030)
Supplement: NIHMS1553272-supplement-1.pdf [file NIHMS1553272-supplement-1.pdf]

**Complete set of supplementary Figures:**

Effect size = 0

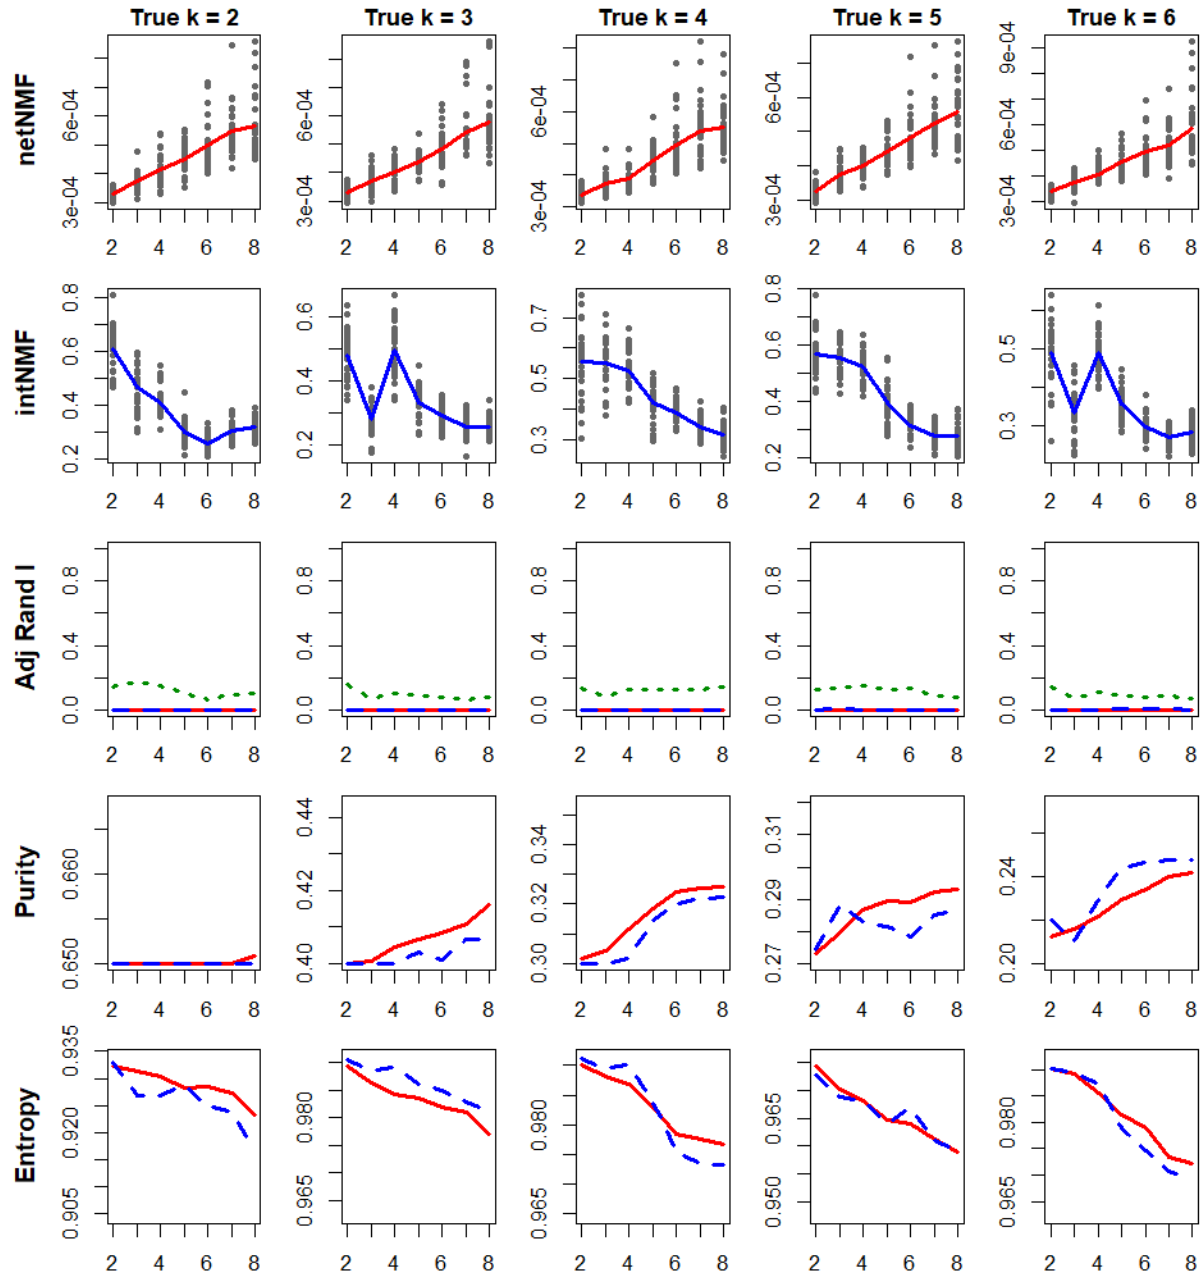

**Fig. S1: Comparison of netNMF and intNMF over varying k and effect size = 0.** First row represents the Silhouette width for netNMF, second row represents Cluster prediction Index (CPI) for intNMF method. The third row represents adjusted rand index between (i) true and netNMF-clusters (red), (ii) true and intNMF-clusters (blue) and (iii) netNMF-clusters and intNMF-clusters (green). Fourth and fifth rows represent the plot of *purity* and *entropy* for netNMF (red) and intNMF (blue).

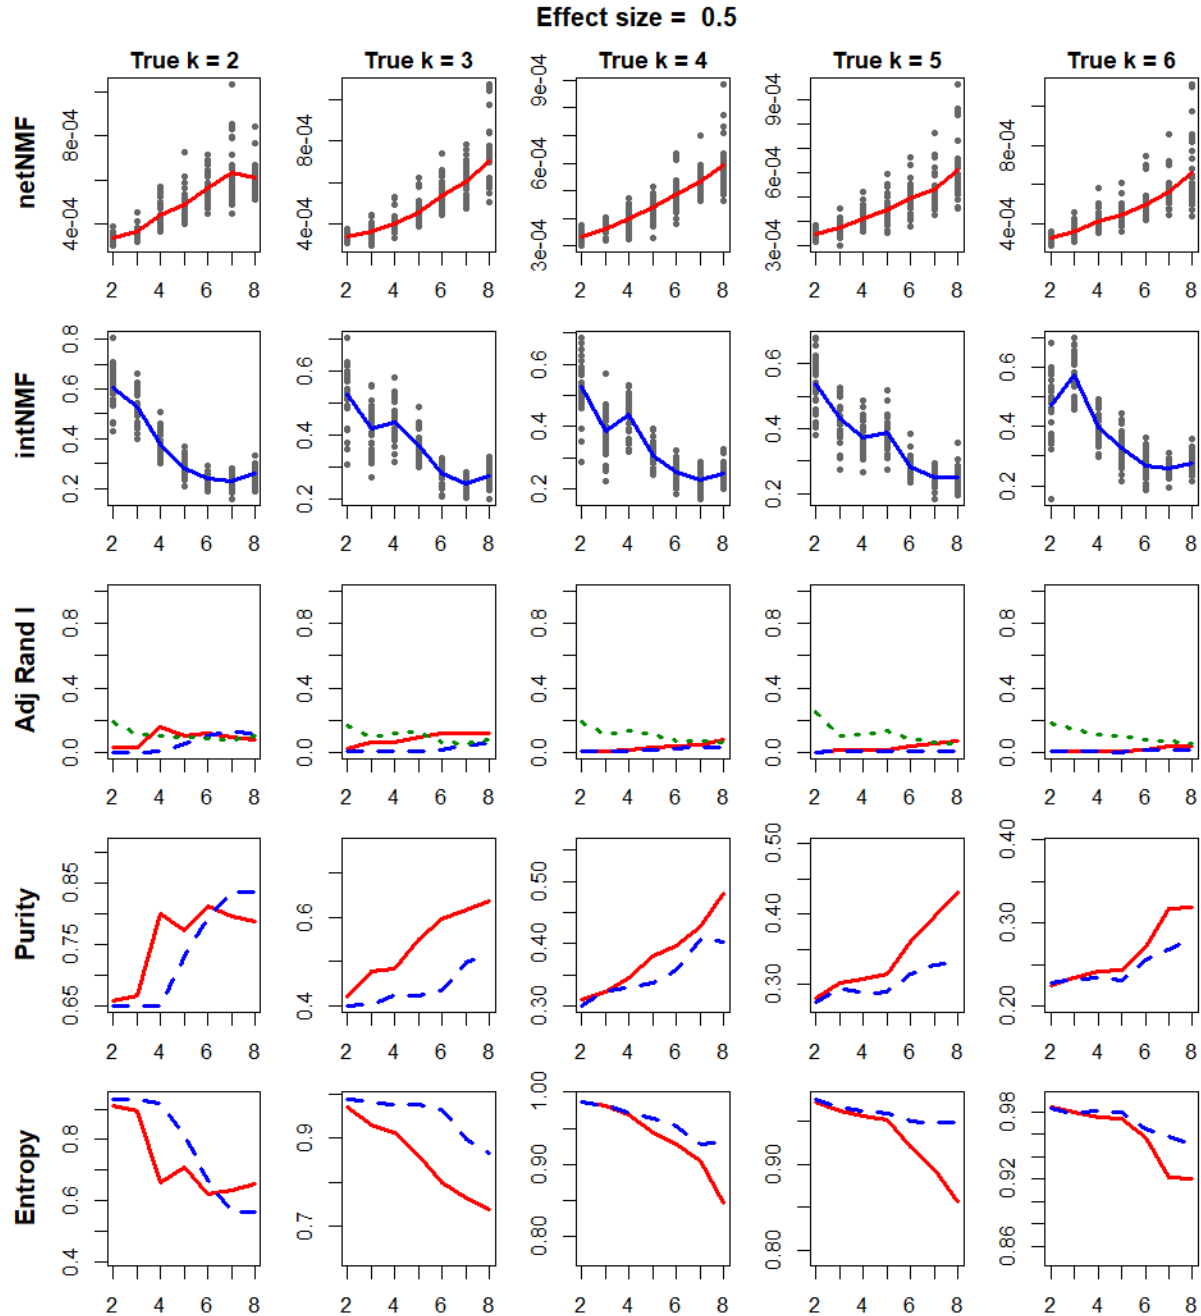

**Fig. S2: Comparison of netNMF and intNMF over varying  $k$  and effect size = 0.5.** First row represents the Silhouette width for netNMF, second row represents Cluster prediction Index (CPI) for intNMF method. The third row represents adjusted rand index between (i) true and netNMF-clusters (red), (ii) true and intNMF-clusters (blue) and (iii) netNMF-clusters and intNMF-clusters (green). Fourth and fifth rows represent the plot of *purity* and *entropy* for netNMF (red) and intNMF (blue).

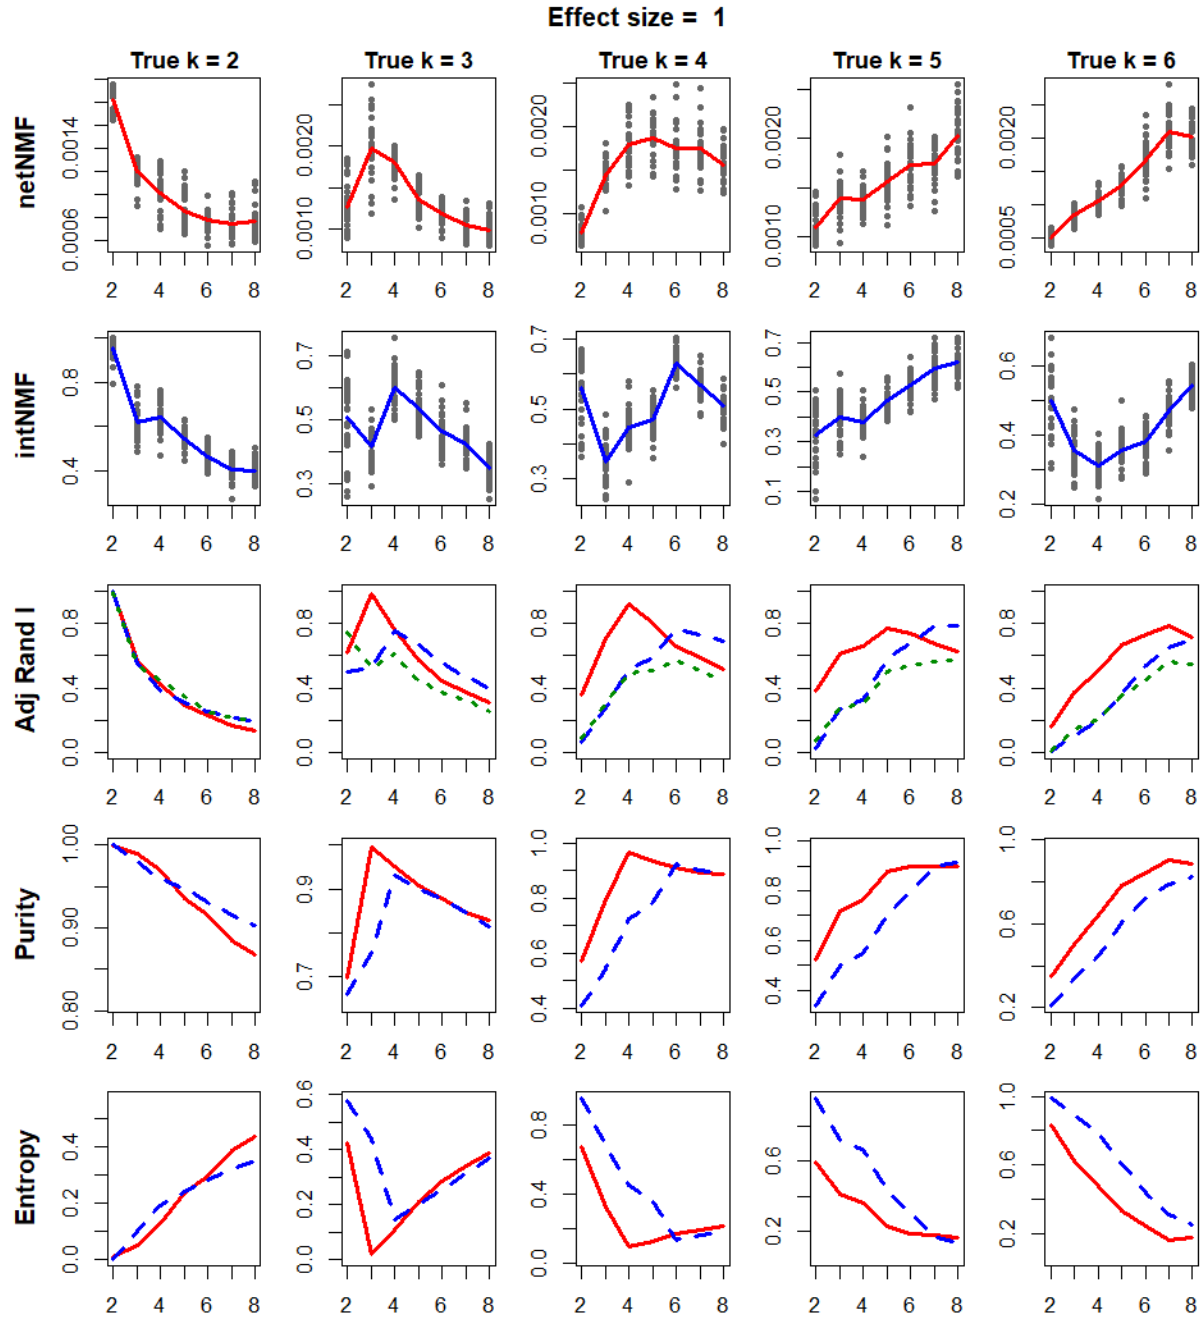

**Fig. S3: Comparison of netNMF and intNMF over varying  $k$  and effect size = 1.** First row represents the Silhouette width for netNMF, second row represents Cluster prediction Index (CPI) for intNMF method. The third row represents adjusted rand index between (i) true and netNMF-clusters (red), (ii) true and intNMF-clusters (blue) and (iii) netNMF-clusters and intNMF-clusters (green). Fourth and fifth rows represent the plot of *purity* and *entropy* for netNMF (red) and intNMF (blue).

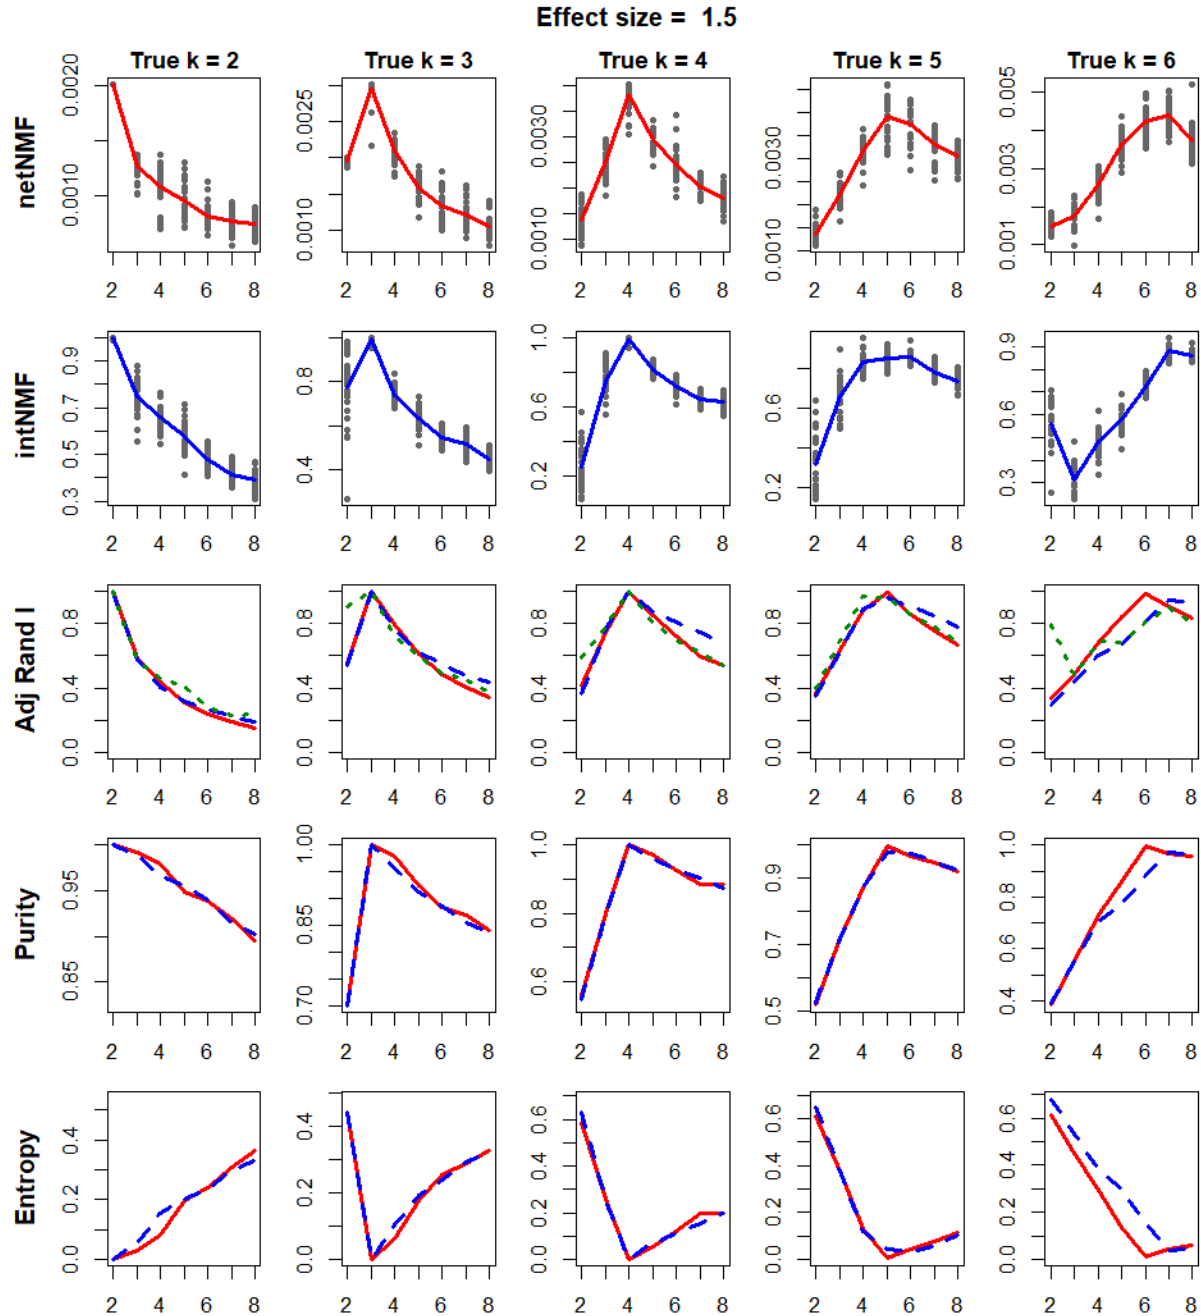

**Fig. S4: Comparison of netNMF and intNMF over varying  $k$  and effect size = 1.5.** First row represents the Silhouette width for netNMF, second row represents Cluster prediction Index (CPI) for intNMF method. The third row represents adjusted rand index between (i) true and netNMF-clusters (red), (ii) true and intNMF-clusters (blue) and (iii) netNMF-clusters and intNMF-clusters (green). Fourth and fifth rows represent the plot of *purity* and *entropy* for netNMF (red) and intNMF (blue).

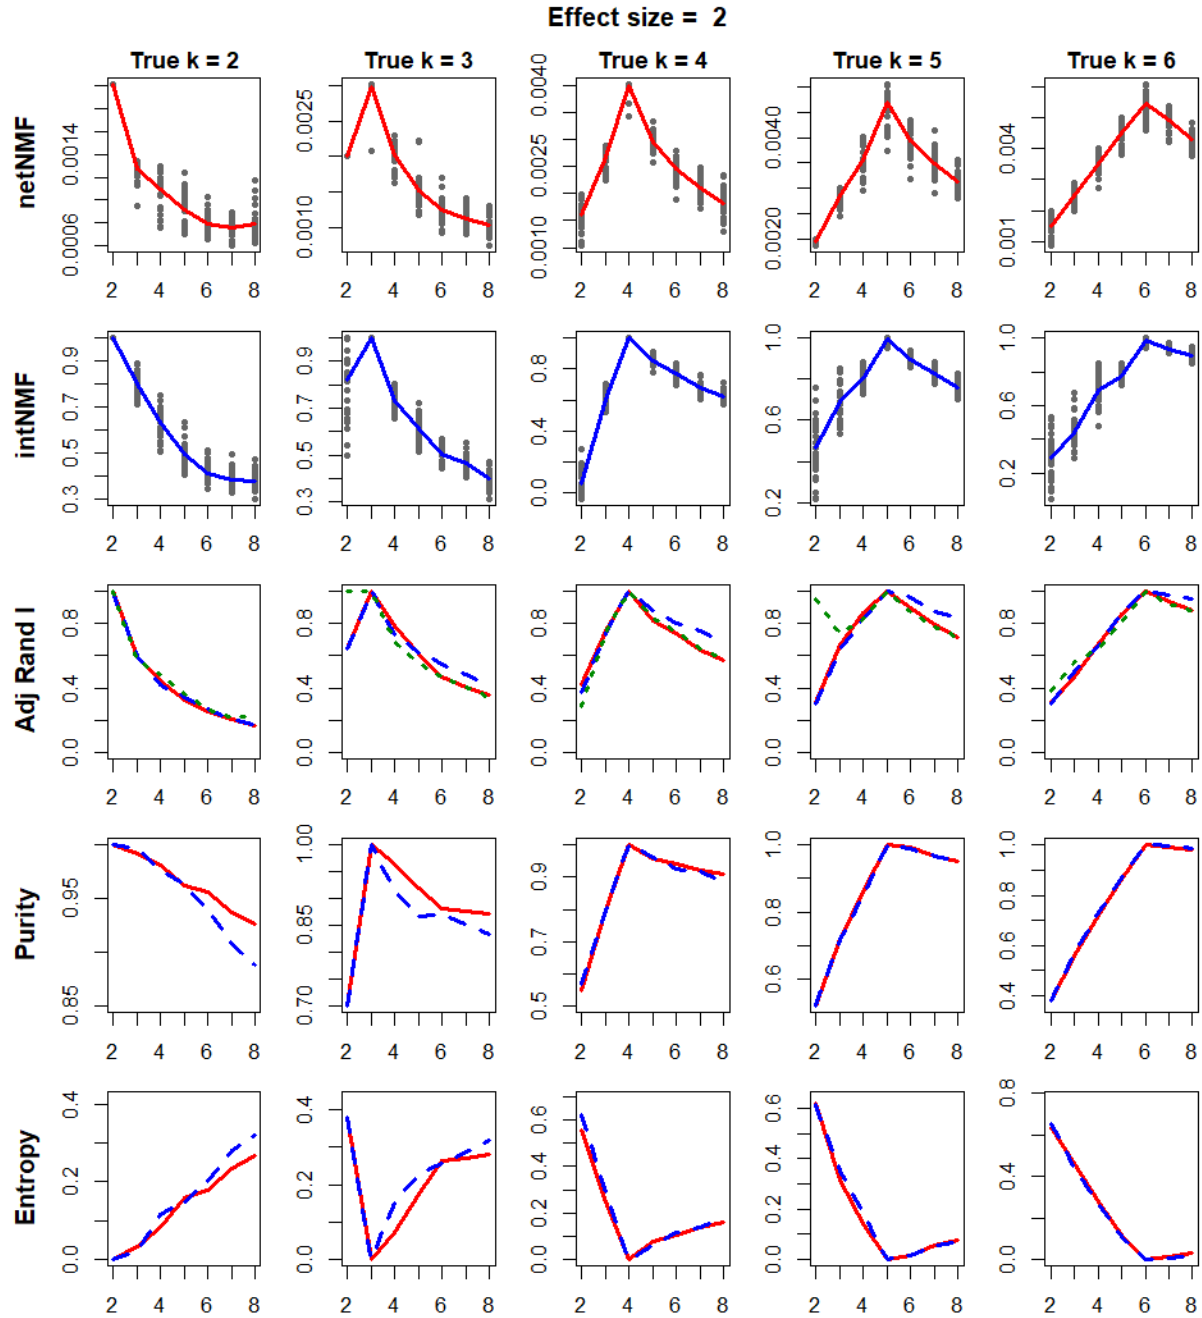

**Fig. S5: Comparison of netNMF and intNMF over varying  $k$  and effect size = 2.** First row represents the Silhouette width for netNMF, second row represents Cluster prediction Index (CPI) for intNMF method. The third row represents adjusted rand index between (i) true and netNMF-clusters (red), (ii) true and intNMF-clusters (blue) and (iii) netNMF-clusters and intNMF-clusters (green). Fourth and fifth rows represent the plot of *purity* and *entropy* for netNMF (red) and intNMF (blue).

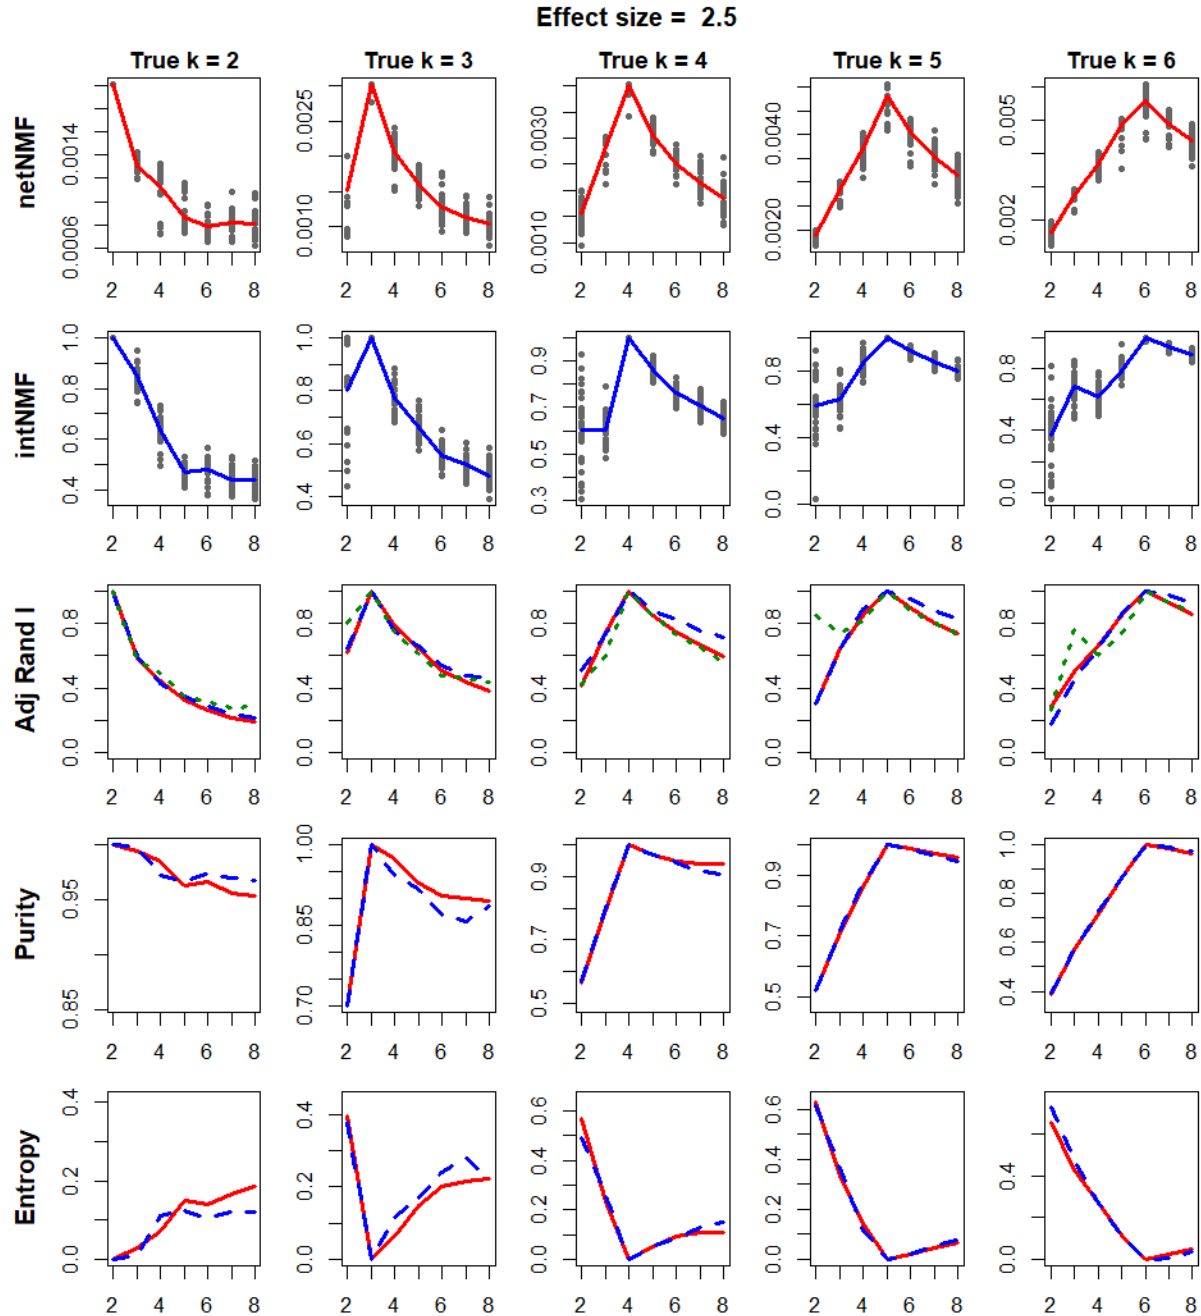

**Fig. S6: Comparison of netNMF and intNMF over varying  $k$  and effect size = 2.5.** First row represents the Silhouette width for netNMF, second row represents Cluster prediction Index (CPI) for intNMF method. The third row represents adjusted rand index between (i) true and netNMF-clusters (red), (ii) true and intNMF-clusters (blue) and (iii) netNMF-clusters and intNMF-clusters (green). Fourth and fifth rows represent the plot of *purity* and *entropy* for netNMF (red) and intNMF (blue).

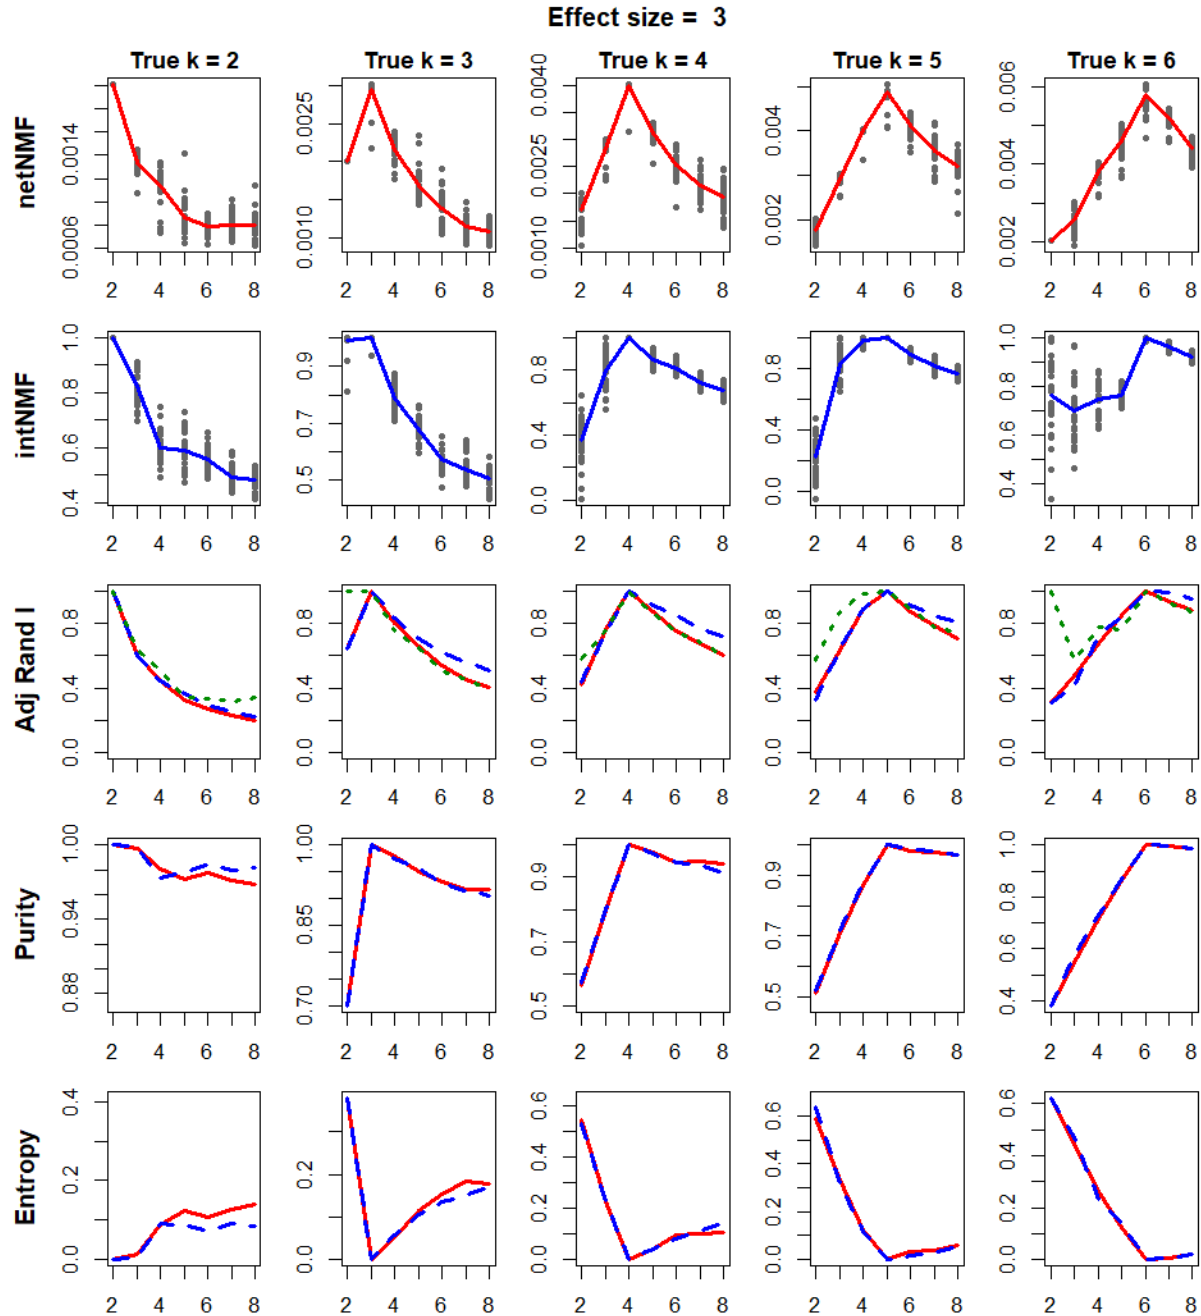

**Fig. S7: Comparison of netNMF and intNMF over varying  $k$  and effect size = 3.** First row represents the Silhouette width for netNMF, second row represents Cluster prediction Index (CPI) for intNMF method. The third row represents adjusted rand index between (i) true and netNMF-clusters (red), (ii) true and intNMF-clusters (blue) and (iii) netNMF-clusters and intNMF-clusters (green). Fourth and fifth rows represent the plot of *purity* and *entropy* for netNMF (red) and intNMF (blue).

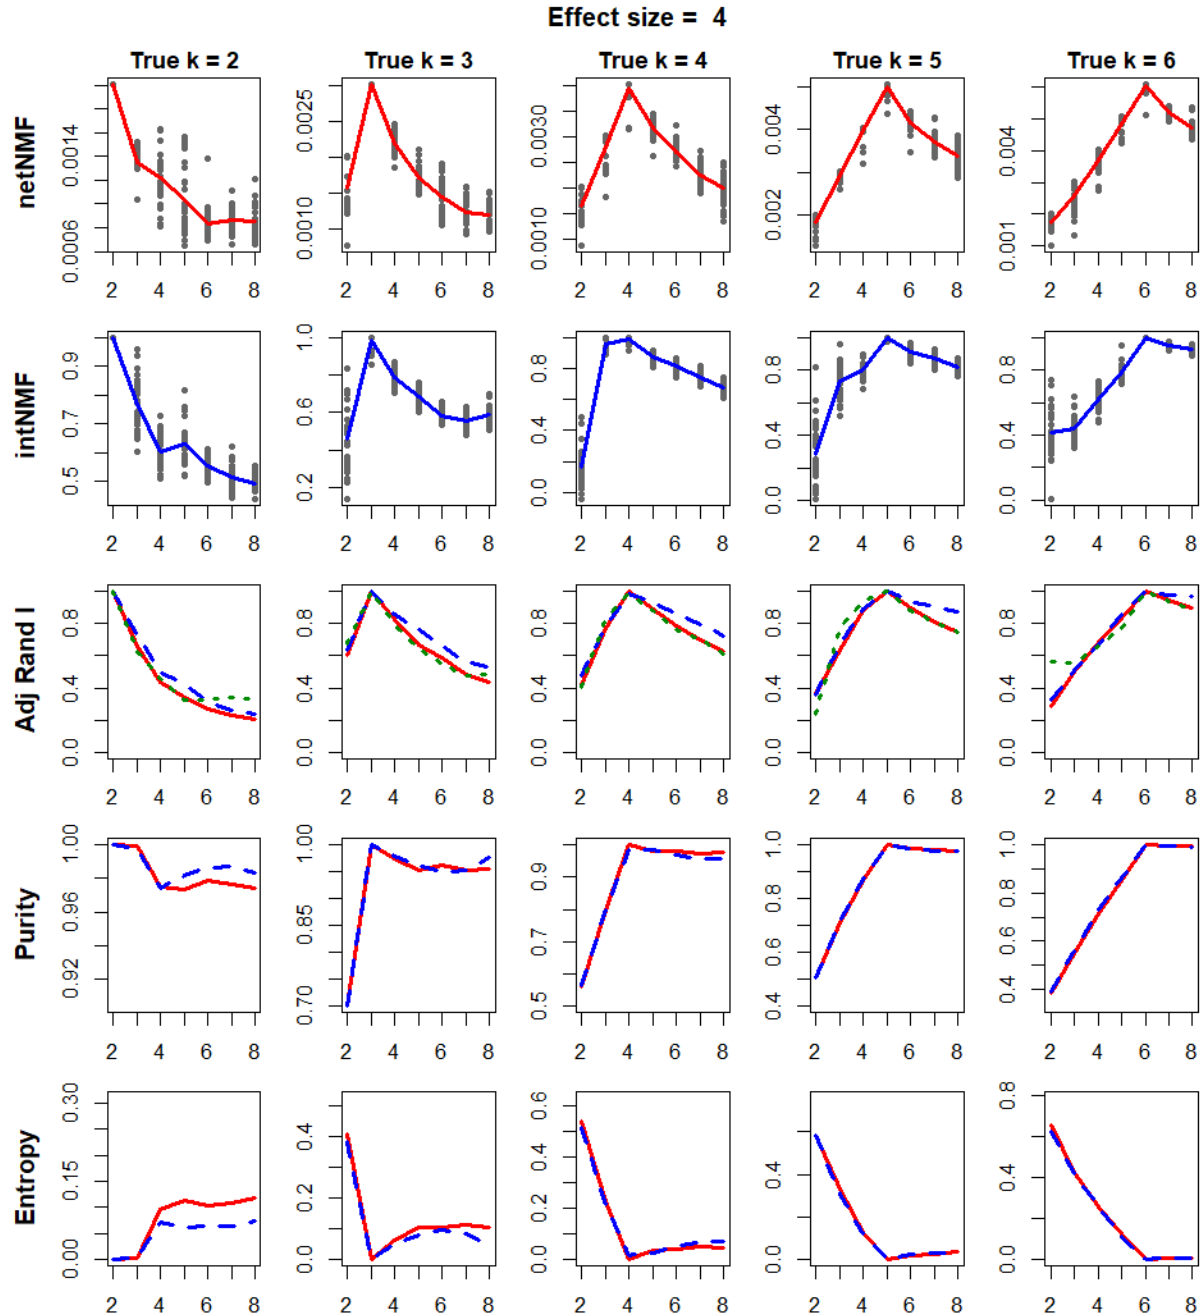

**Fig. S8: Comparison of netNMF and intNMF over varying  $k$  and effect size = 4.** First row represents the Silhouette width for netNMF, second row represents Cluster prediction Index (CPI) for intNMF method. The third row represents adjusted rand index between (i) true and netNMF-clusters (red), (ii) true and intNMF-clusters (blue) and (iii) netNMF-clusters and intNMF-clusters (green). Fourth and fifth rows represent the plot of *purity* and *entropy* for netNMF (red) and intNMF (blue).



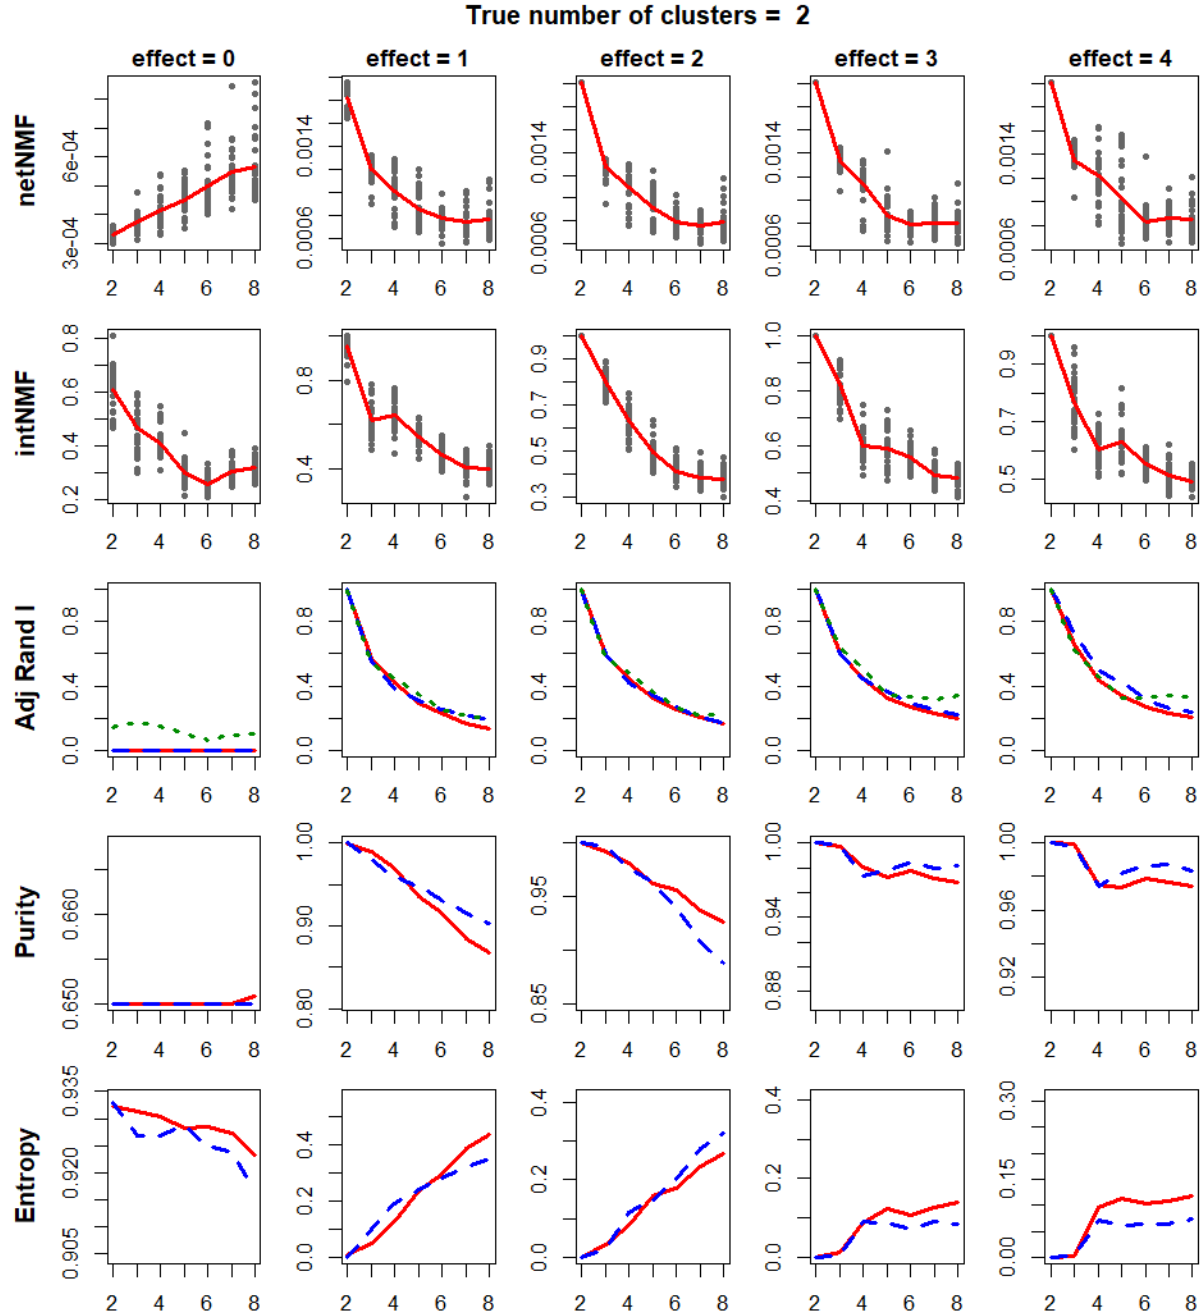

**Fig. S9: Comparison of netNMF and intNMF over varying effect size and  $k = 2$ .** First row represents the Silhouette width for netNMF, second row represents Cluster prediction Index (CPI) for intNMF method. The third row represents adjusted rand index between (i) true and netNMF-clusters (red), (ii) true and intNMF-clusters (blue) and (iii) netNMF-clusters and intNMF-clusters (green). Fourth and fifth rows represent the plot of *purity* and *entropy* for netNMF (red) and intNMF (blue).

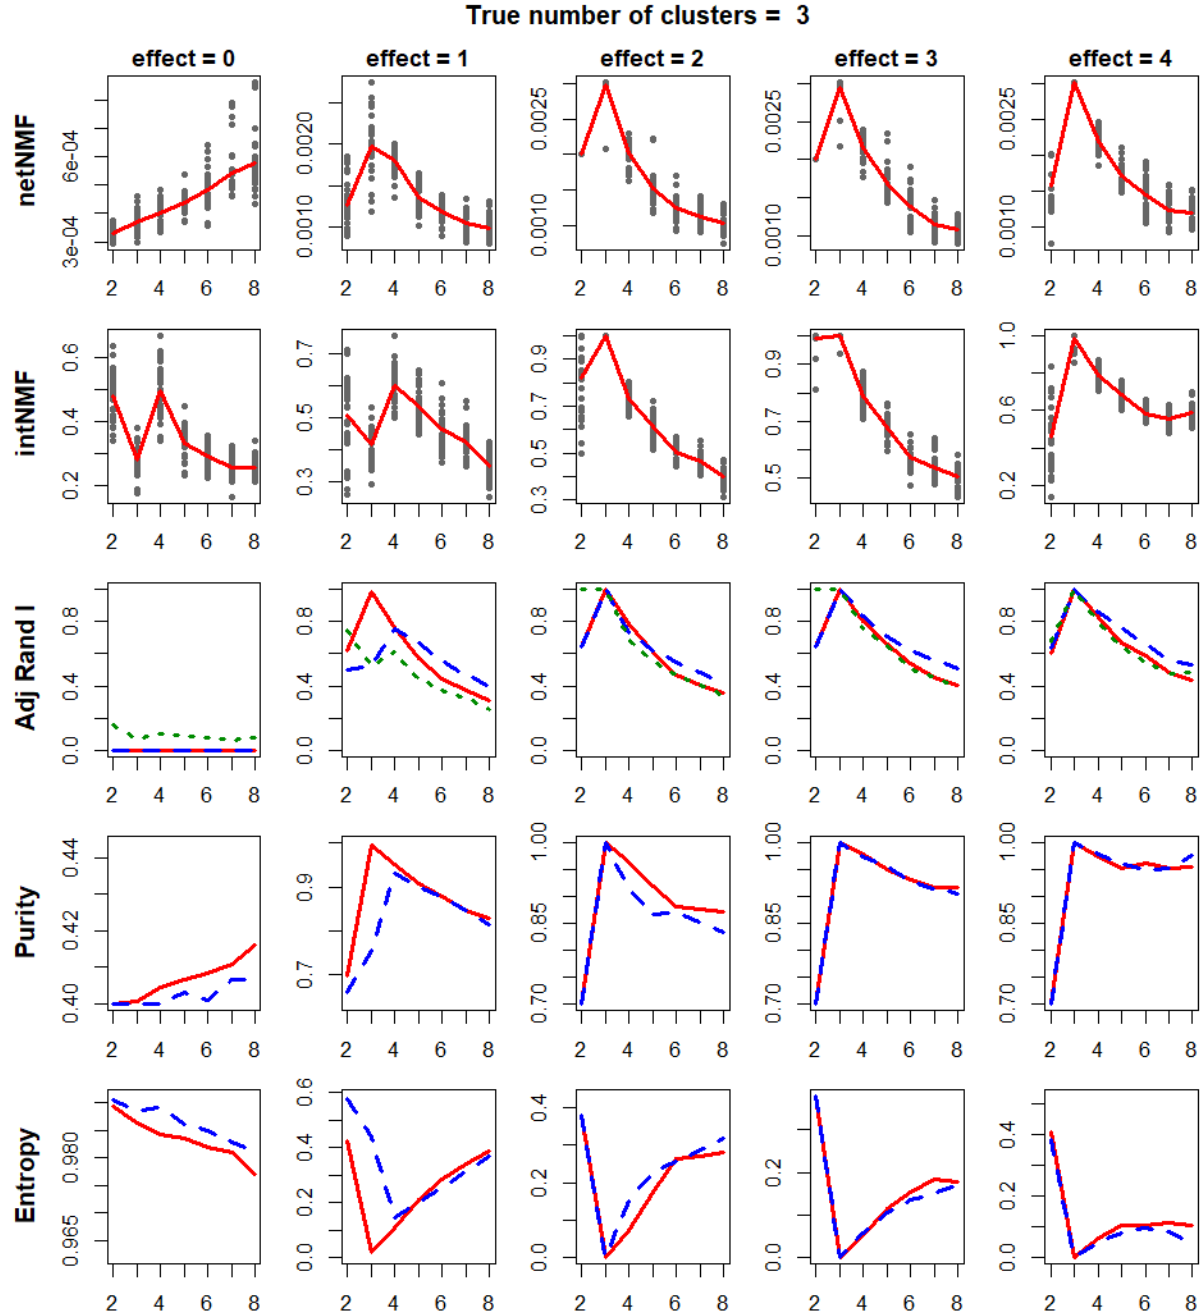

**Fig. S10: Comparison of netNMF and intNMF over varying effect size and  $k = 3$ .** First row represents the Silhouette width for netNMF, second row represents Cluster prediction Index (CPI) for intNMF method. The third row represents adjusted rand index between (i) true and netNMF-clusters (red), (ii) true and intNMF-clusters (blue) and (iii) netNMF-clusters and intNMF-clusters (green). Fourth and fifth rows represent the plot of *purity* and *entropy* for netNMF (red) and intNMF (blue).

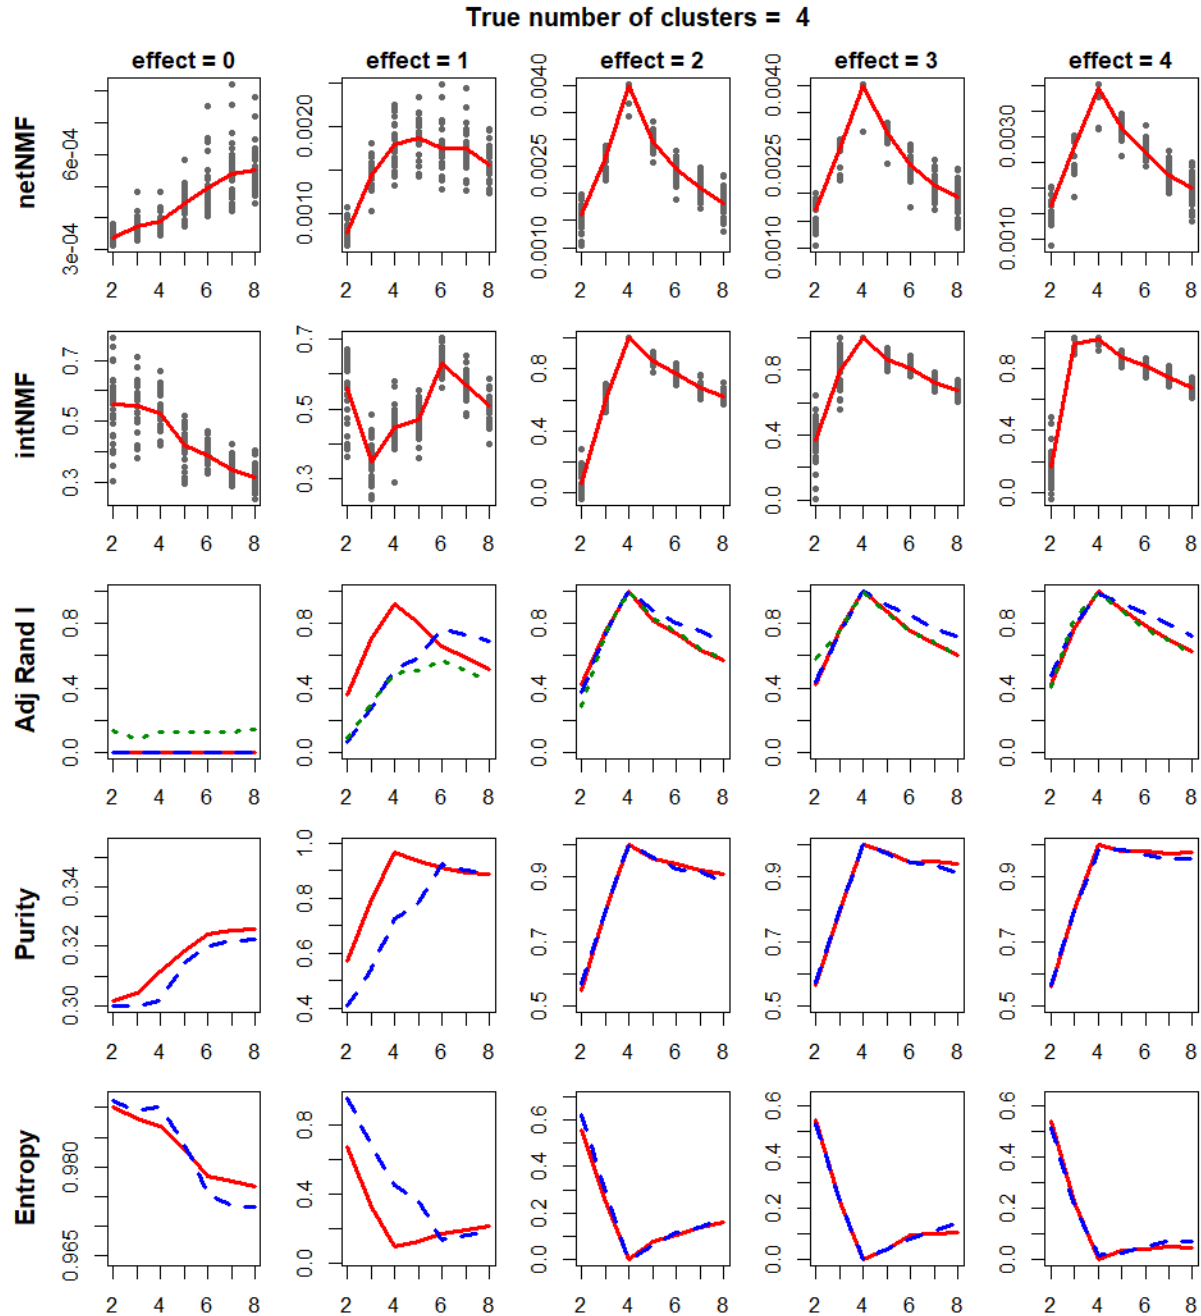

**Fig. S11: Comparison of netNMF and intNMF over varying effect size and  $k = 4$ .** First row represents the Silhouette width for netNMF, second row represents Cluster prediction Index (CPI) for intNMF method. The third row represents adjusted rand index between (i) true and netNMF-clusters (red), (ii) true and intNMF-clusters (blue) and (iii) netNMF-clusters and intNMF-clusters (green). Fourth and fifth rows represent the plot of *purity* and *entropy* for netNMF (red) and intNMF (blue).

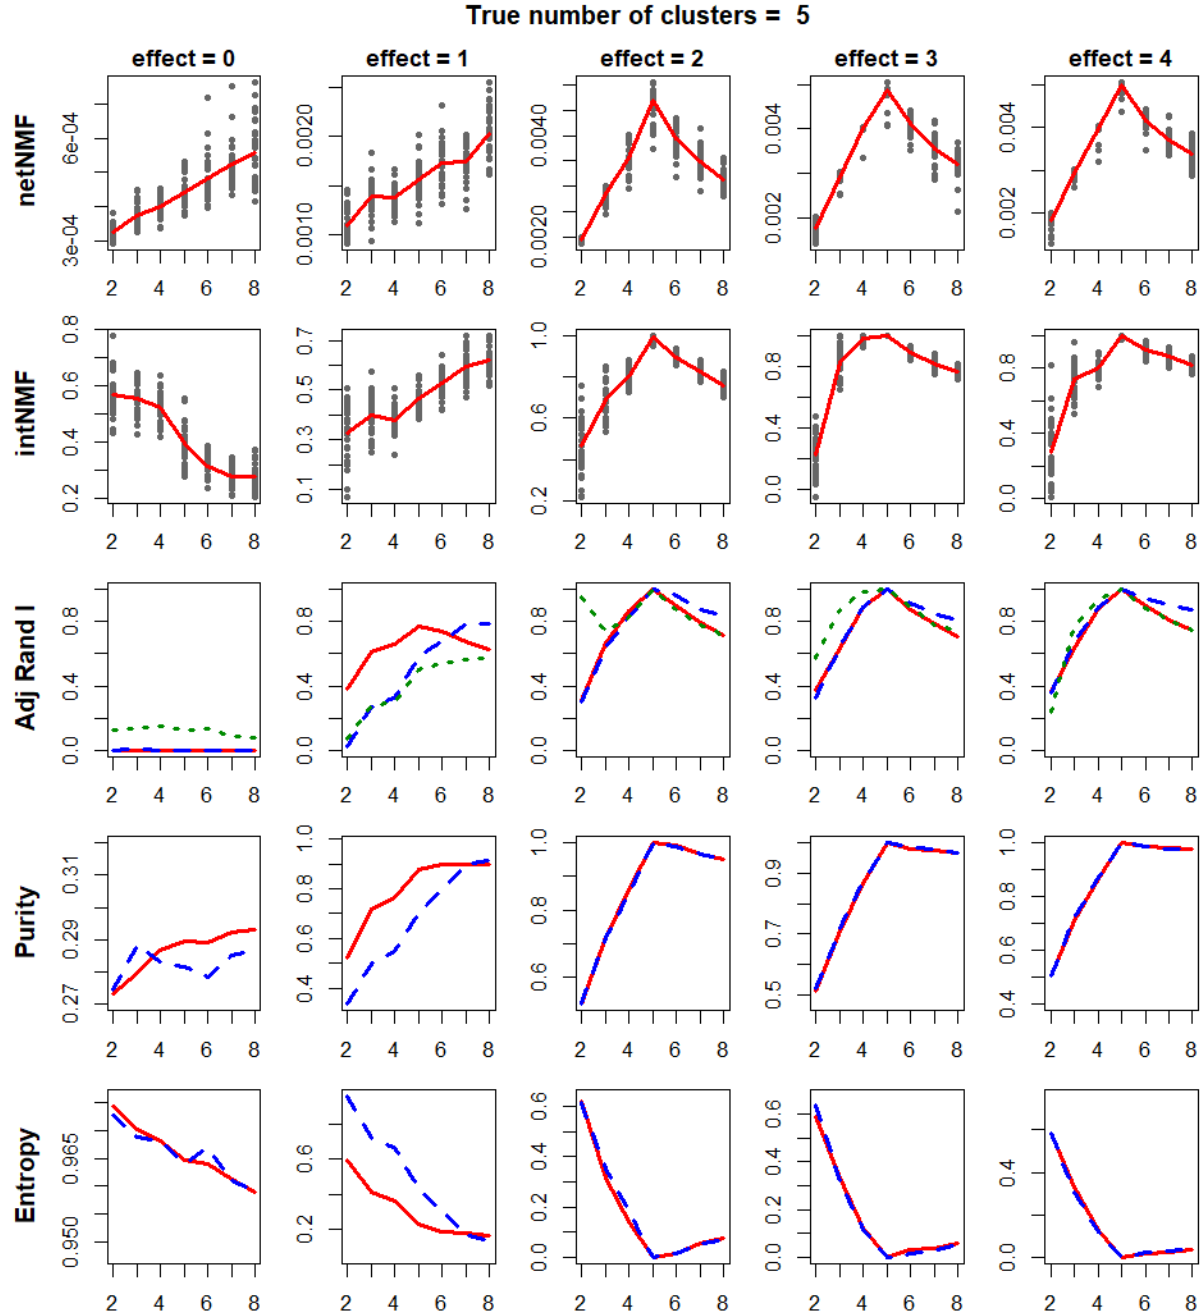

**Fig. S12: Comparison of netNMF and intNMF over varying effect size and  $k = 5$ .** First row represents the Silhouette width for netNMF, second row represents Cluster prediction Index (CPI) for intNMF method. The third row represents adjusted rand index between (i) true and netNMF-clusters (red), (ii) true and intNMF-clusters (blue) and (iii) netNMF-clusters and intNMF-clusters (green). Fourth and fifth rows represent the plot of *purity* and *entropy* for netNMF (red) and intNMF (blue).

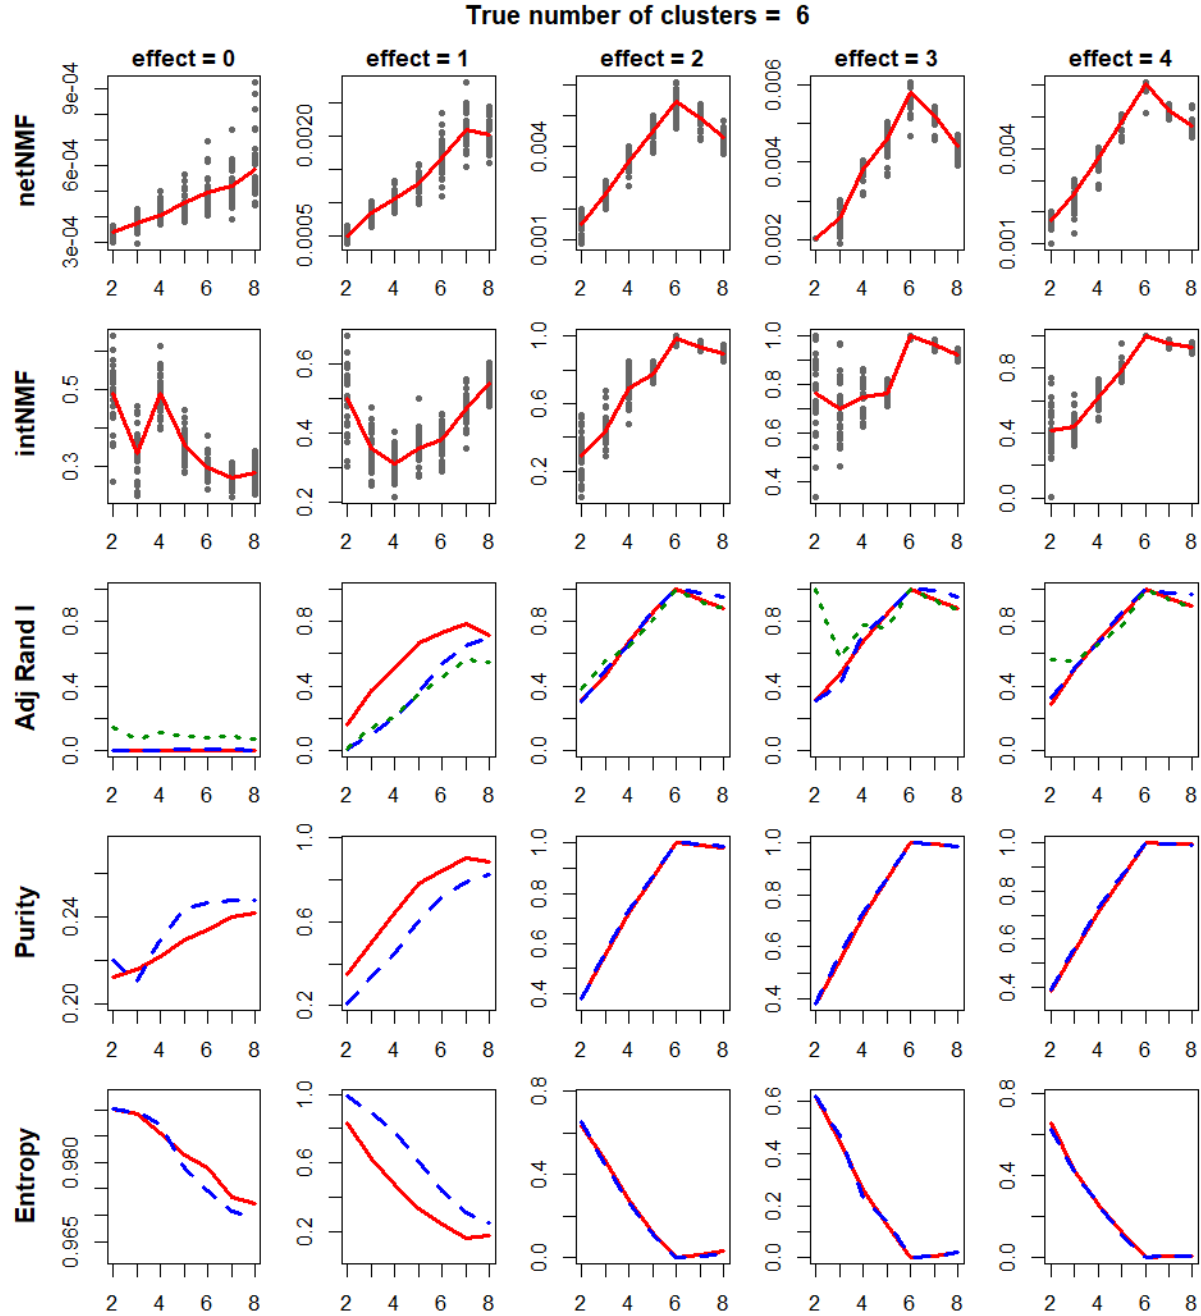

**Fig. S13: Comparison of netNMF and intNMF over varying effect size and  $k = 6$ .** First row represents the Silhouette width for netNMF, second row represents Cluster prediction Index (CPI) for intNMF method. The third row represents adjusted rand index between (i) true and netNMF-clusters (red), (ii) true and intNMF-clusters (blue) and (iii) netNMF-clusters and intNMF-clusters (green). Fourth and fifth rows represent the plot of *purity* and *entropy* for netNMF (red) and intNMF (blue).

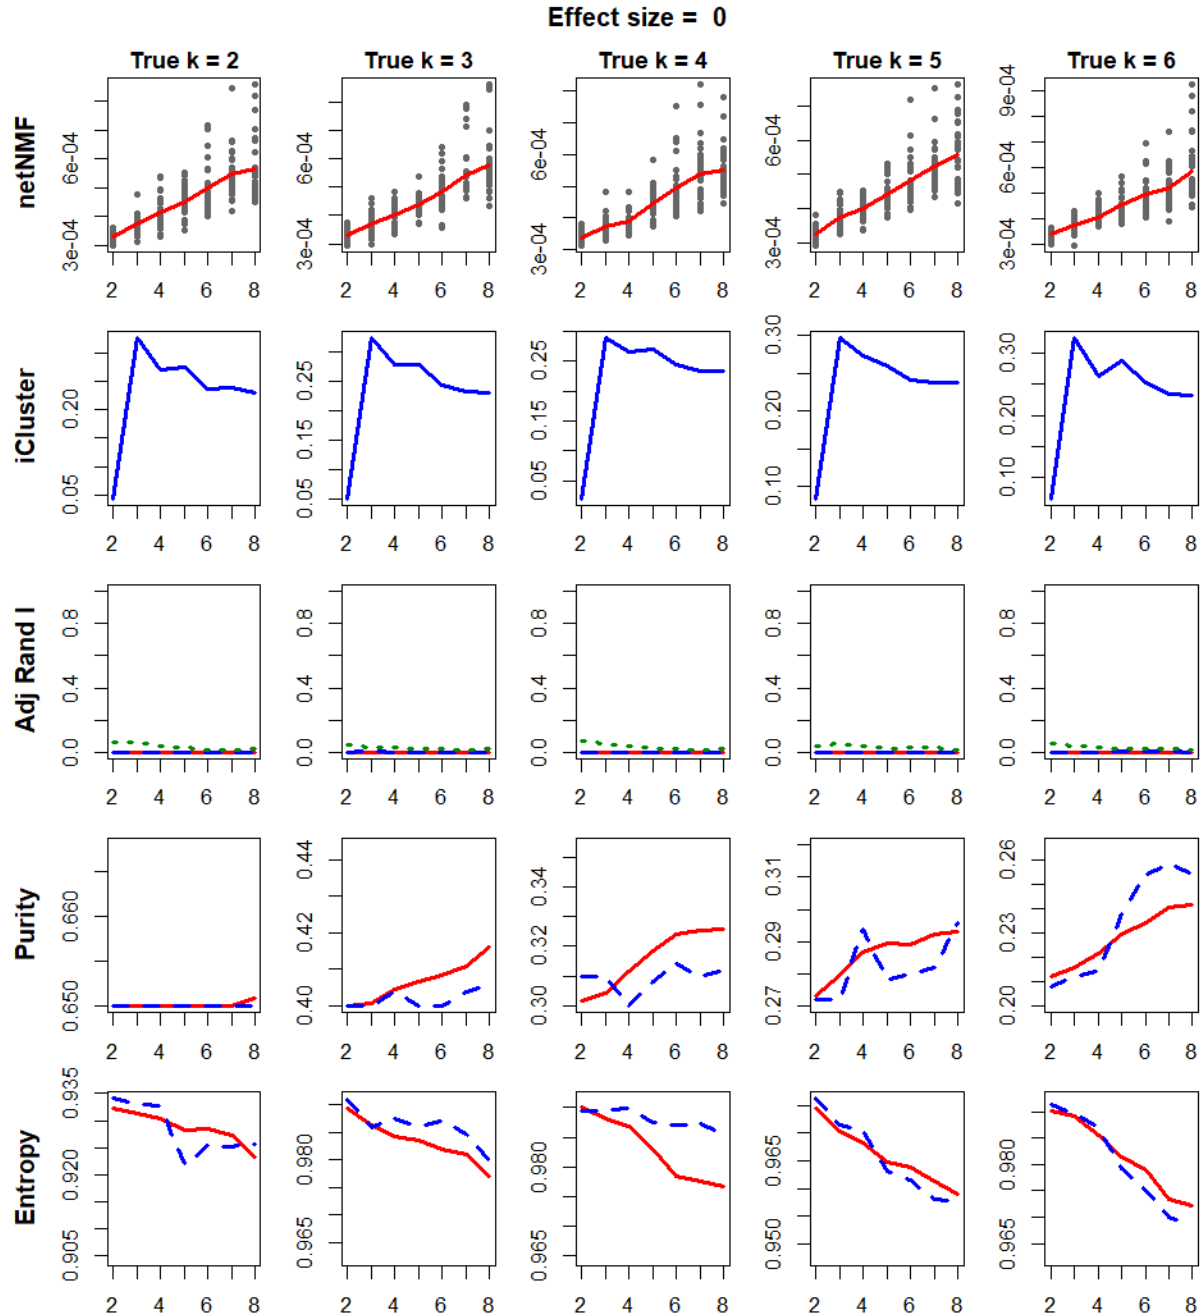

**Fig. S14: Comparison of netNMF and iCluster over varying  $k$  and effect size = 0.** First row represents the Silhouette width for netNMF, second row represents Proportion of Deviance (POD) for iCluster method. The third row represents adjusted rand index between (i) true and netNMF-clusters (red), (ii) true and iCluster-clusters (blue) and (iii) netNMF-clusters and iCluster-clusters (green). Fourth and fifth rows represent the plot of *purity* and *entropy* for netNMF (red) and iCluster (blue).

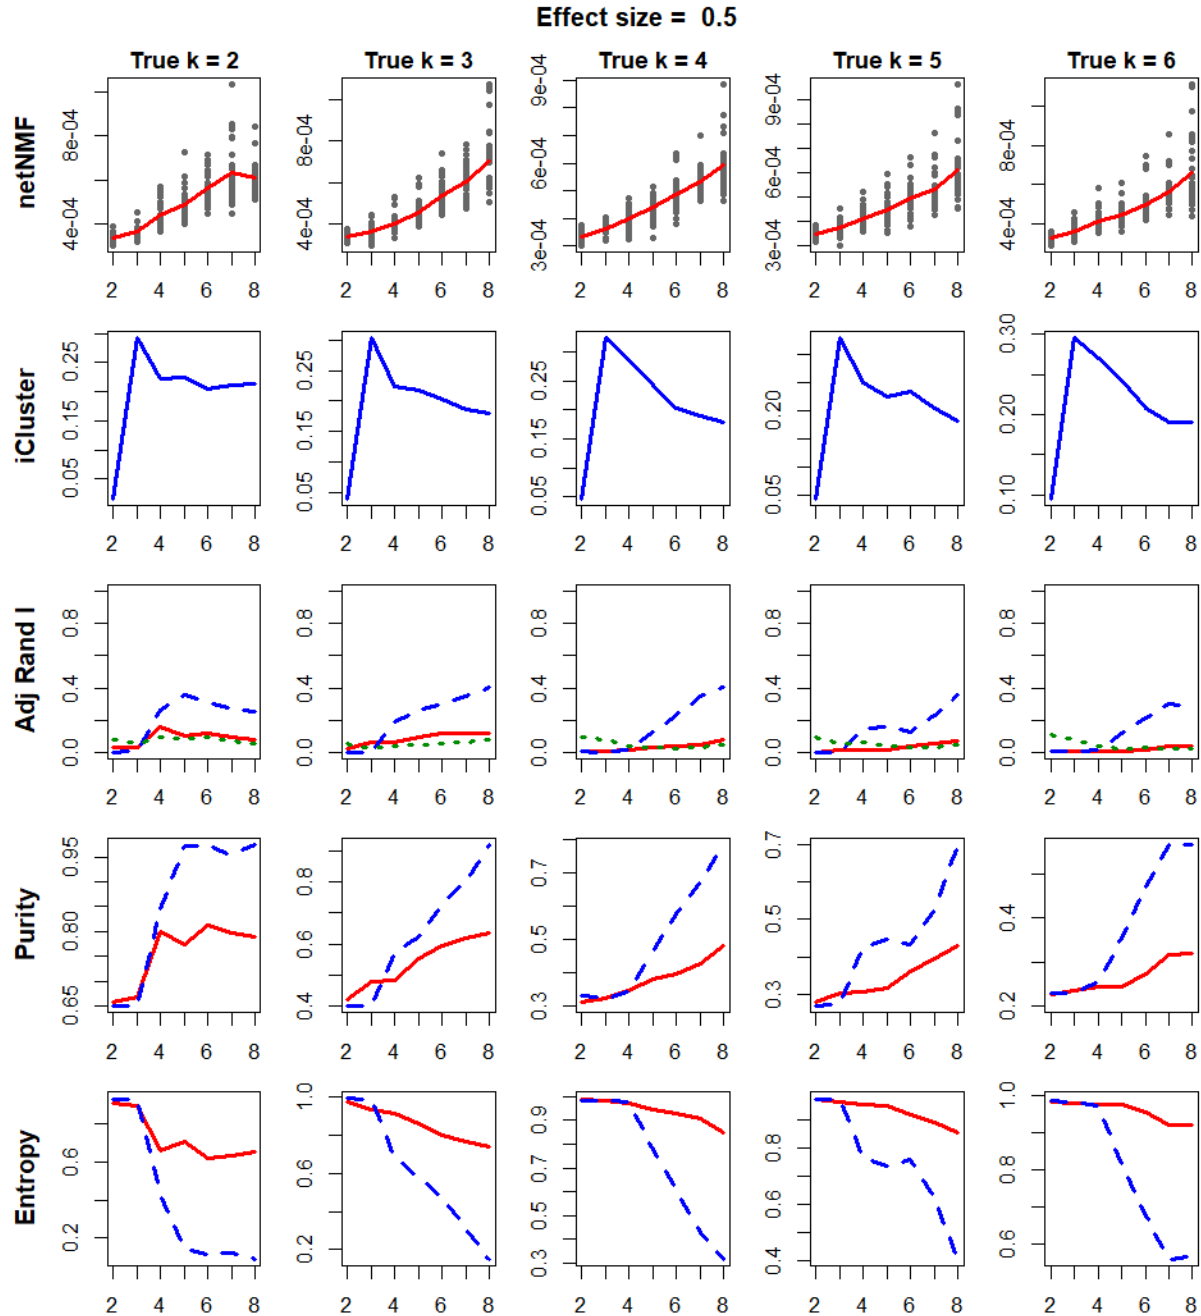

**Fig. S15: Comparison of netNMF and iCluster over varying  $k$  and effect size = 0.5.** First row represents the Silhouette width for netNMF, second row represents Proportion of Deviance (POD) for iCluster method. The third row represents adjusted rand index between (i) true and netNMF-clusters (red), (ii) true and iCluster-clusters (blue) and (iii) netNMF-clusters and iCluster-clusters (green). Fourth and fifth rows represent the plot of *purity* and *entropy* for netNMF (red) and iCluster (blue).

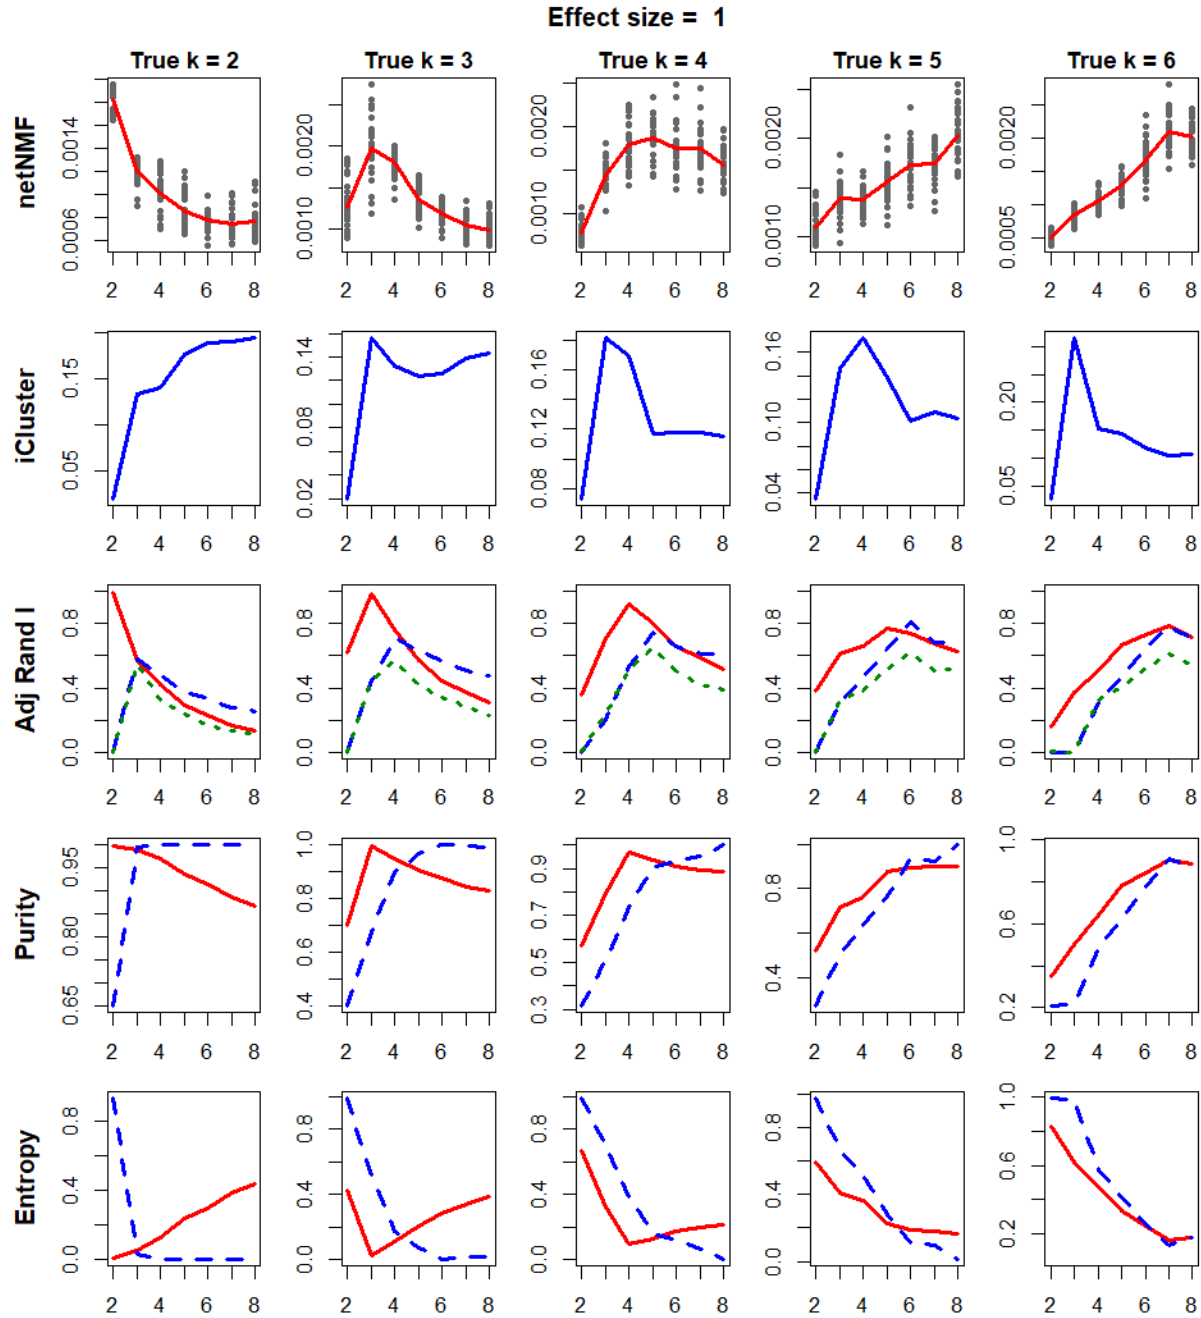

**Fig. S16: Comparison of netNMF and iCluster over varying  $k$  and effect size = 1.0.** First row represents the Silhouette width for netNMF, second row represents Proportion of Deviance (POD) for iCluster method. The third row represents adjusted rand index between (i) true and netNMF-clusters (red), (ii) true and iCluster-clusters (blue) and (iii) netNMF-clusters and iCluster-clusters (green). Fourth and fifth rows represent the plot of *purity* and *entropy* for netNMF (red) and iCluster (blue).



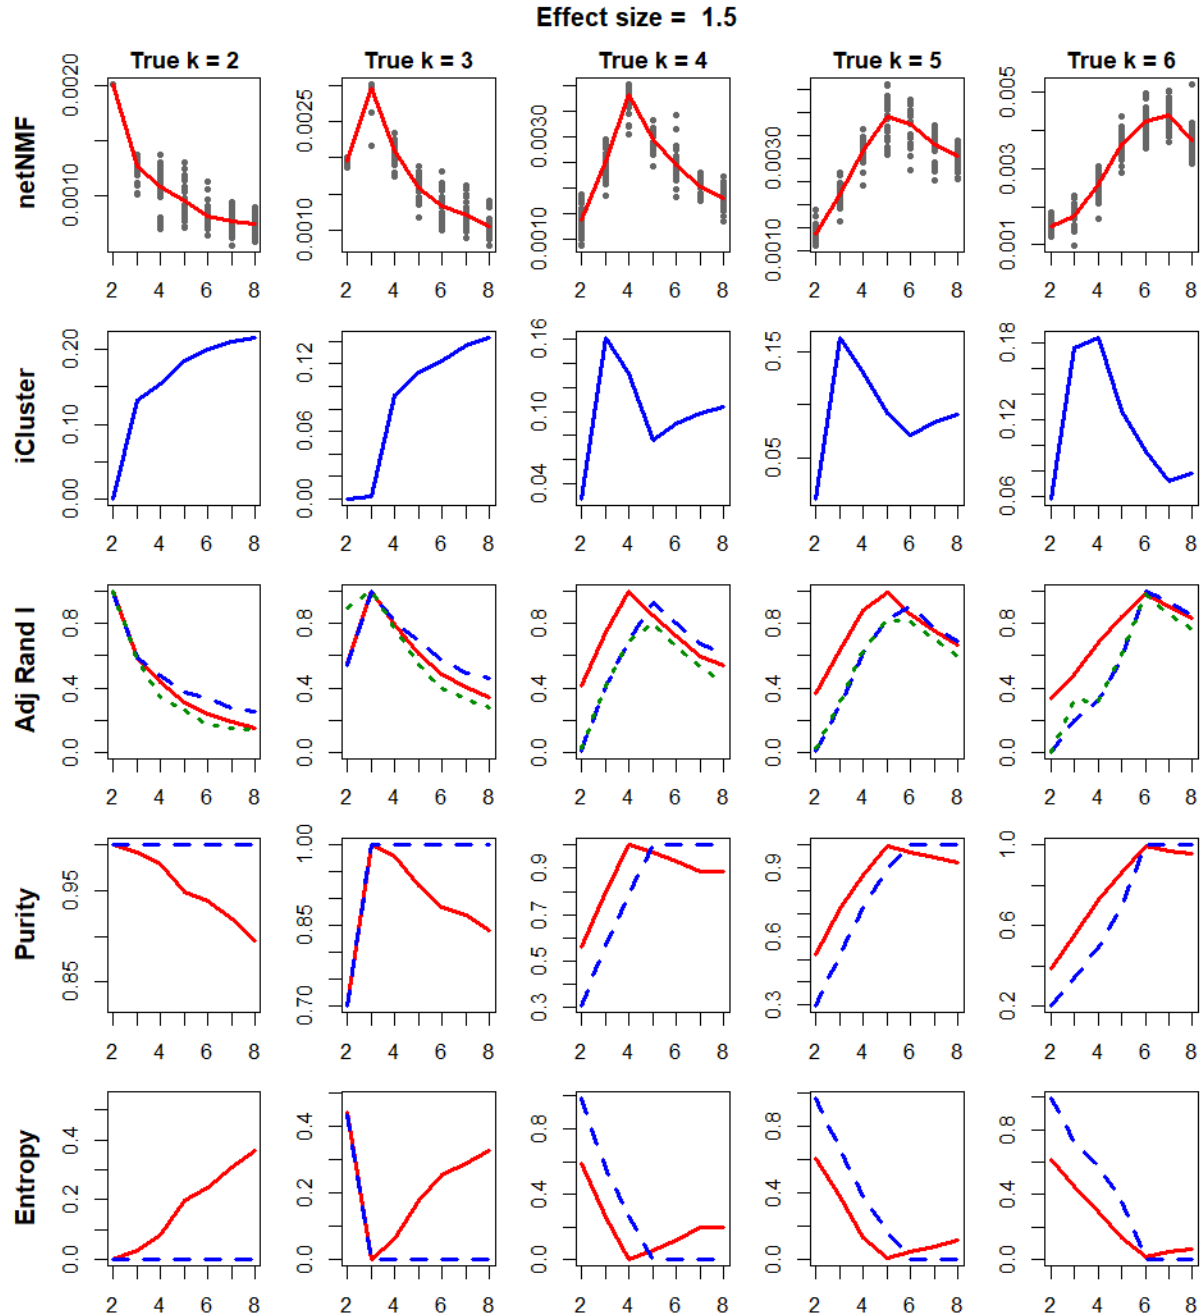

**Fig. S17: Comparison of netNMF and iCluster over varying  $k$  and effect size = 1.5.** First row represents the Silhouette width for netNMF, second row represents Proportion of Deviance (POD) for iCluster method. The third row represents adjusted rand index between (i) true and netNMF-clusters (red), (ii) true and iCluster-clusters (blue) and (iii) netNMF-clusters and iCluster-clusters (green). Fourth and fifth rows represent the plot of *purity* and *entropy* for netNMF (red) and iCluster (blue).

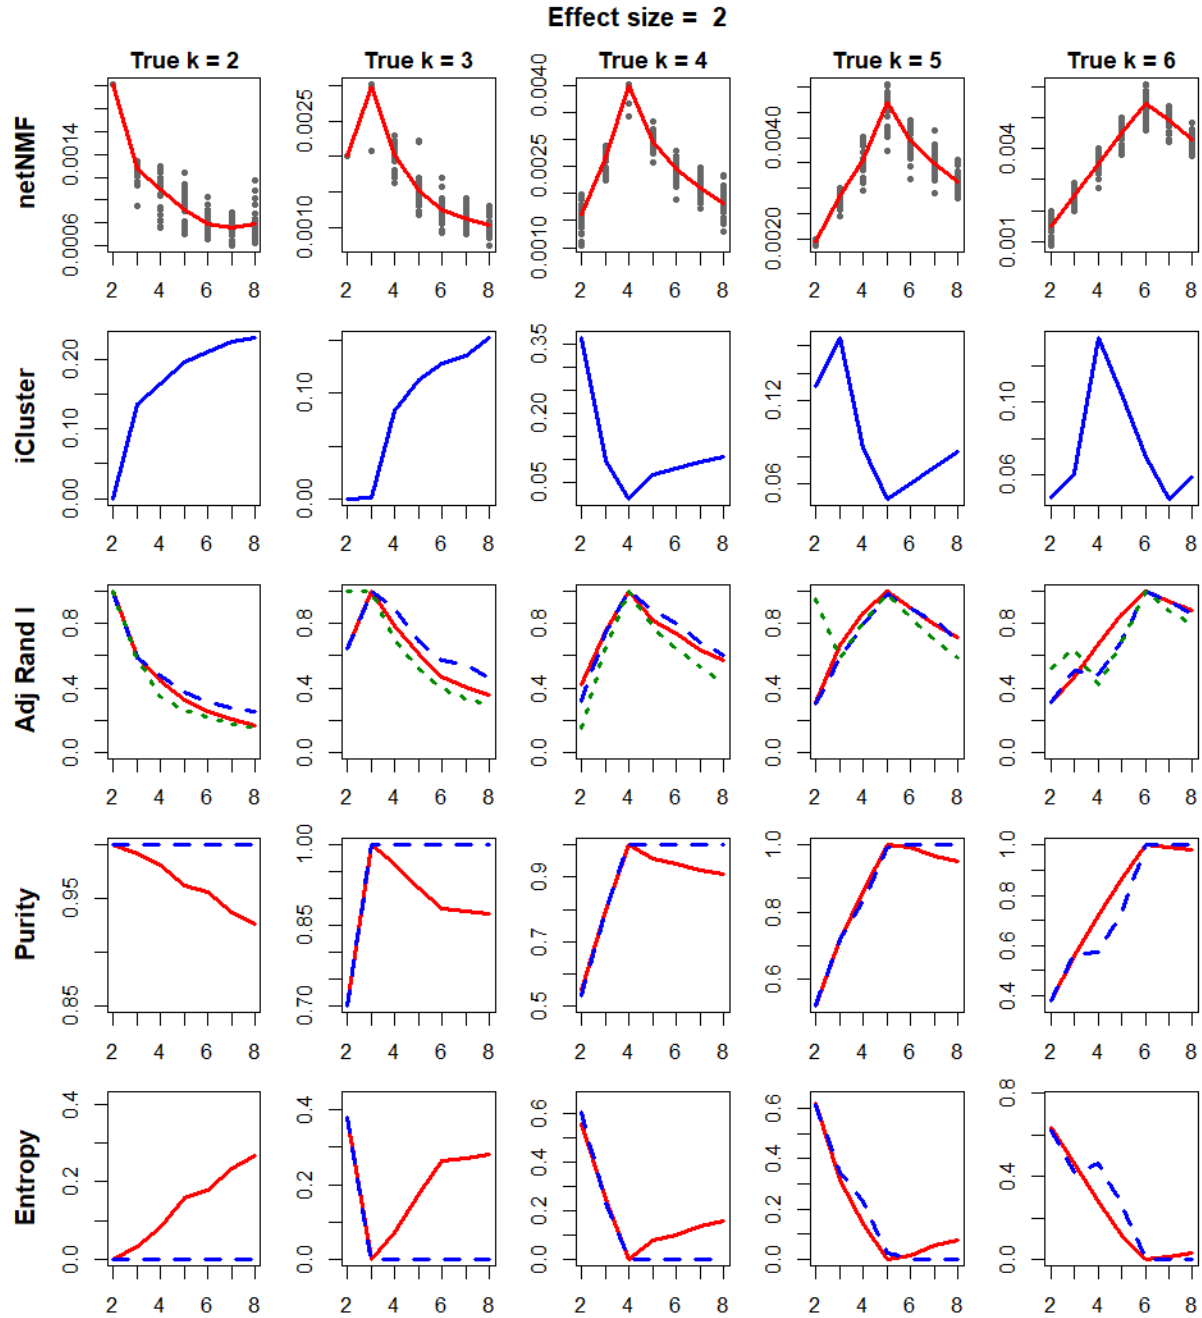

**Fig. S18: Comparison of netNMF and iCluster over varying  $k$  and effect size = 2.0.** First row represents the Silhouette width for netNMF, second row represents Proportion of Deviance (POD) for iCluster method. The third row represents adjusted rand index between (i) true and netNMF-clusters (red), (ii) true and iCluster-clusters (blue) and (iii) netNMF-clusters and iCluster-clusters (green). Fourth and fifth rows represent the plot of *purity* and *entropy* for netNMF (red) and iCluster (blue).

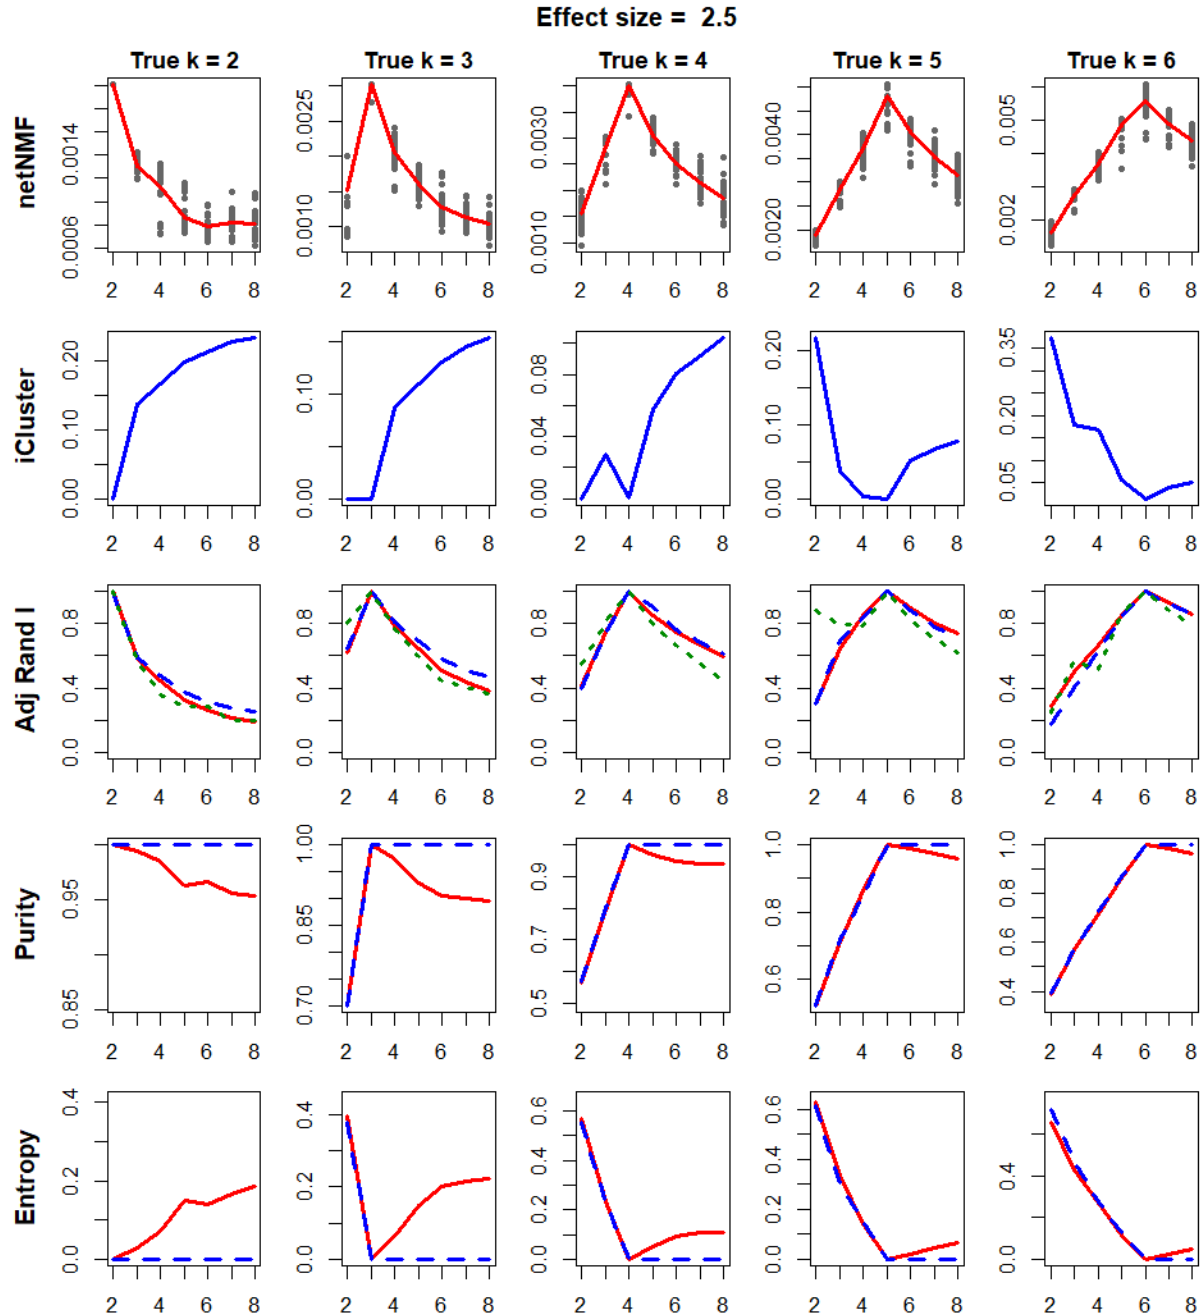

**Fig. S19: Comparison of netNMF and iCluster over varying  $k$  and effect size = 2.5.** First row represents the Silhouette width for netNMF, second row represents Proportion of Deviance (POD) for iCluster method. The third row represents adjusted rand index between (i) true and netNMF-clusters (red), (ii) true and iCluster-clusters (blue) and (iii) netNMF-clusters and iCluster-clusters (green). Fourth and fifth rows represent the plot of *purity* and *entropy* for netNMF (red) and iCluster (blue).

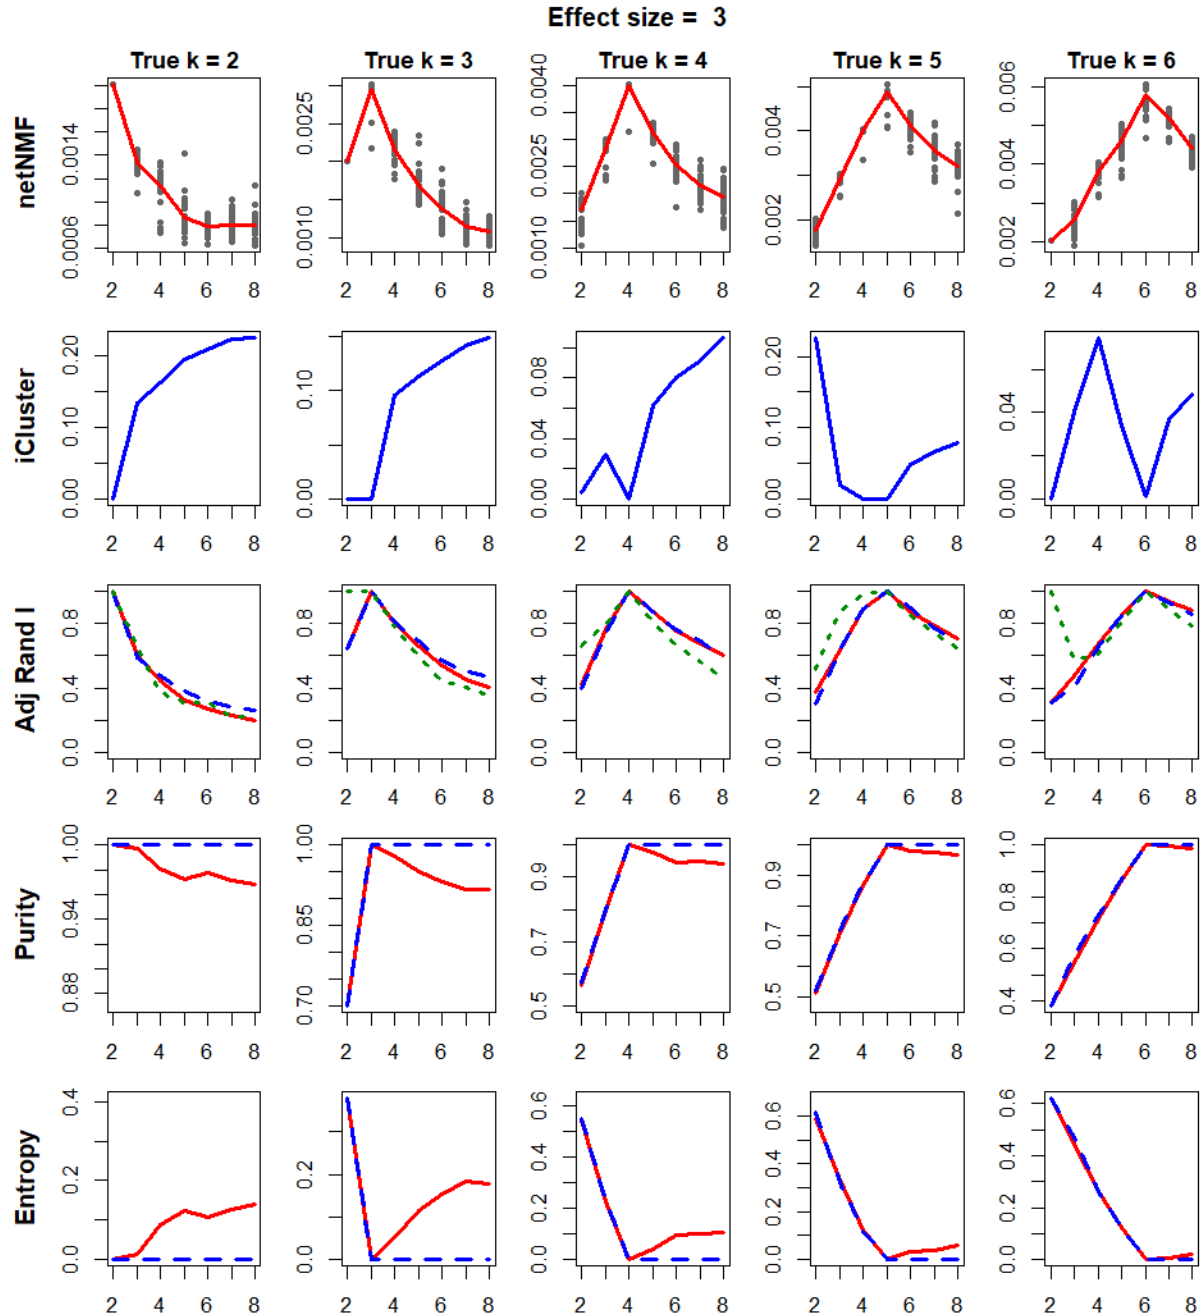

**Fig. S20: Comparison of netNMF and iCluster over varying  $k$  and effect size = 3.0.** First row represents the Silhouette width for netNMF, second row represents Proportion of Deviance (POD) for iCluster method. The third row represents adjusted rand index between (i) true and netNMF-clusters (red), (ii) true and iCluster-clusters (blue) and (iii) netNMF-clusters and iCluster-clusters (green). Fourth and fifth rows represent the plot of *purity* and *entropy* for netNMF (red) and iCluster (blue).

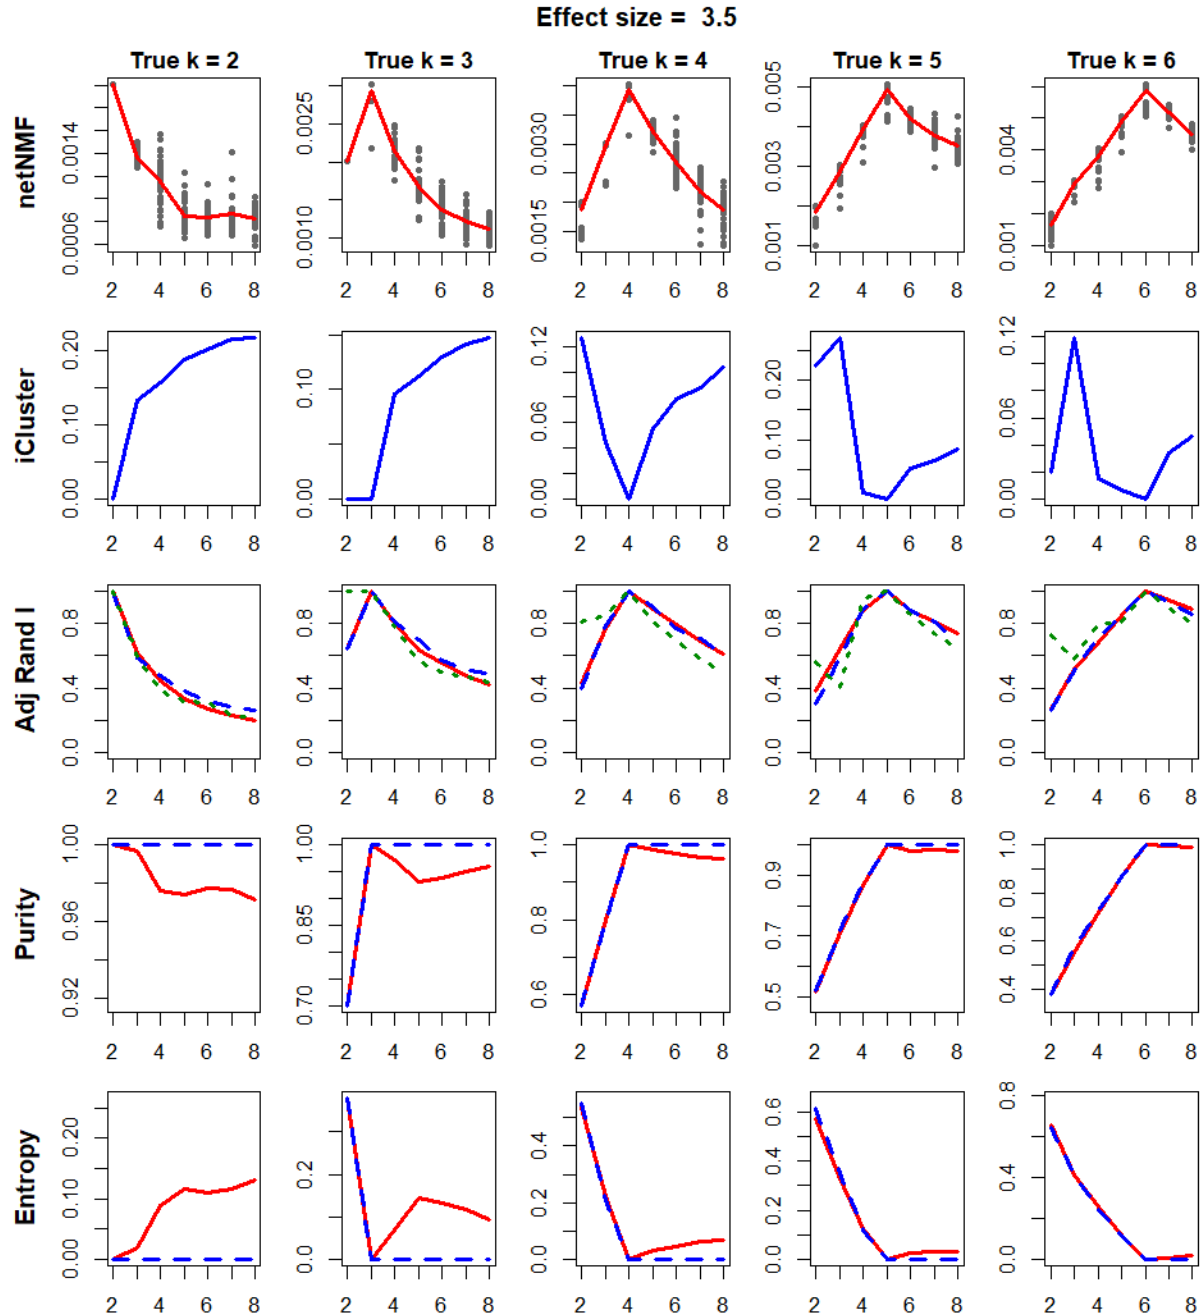

**Fig. S21: Comparison of netNMF and iCluster over varying  $k$  and effect size = 3.5.** First row represents the Silhouette width for netNMF, second row represents Proportion of Deviance (POD) for iCluster method. The third row represents adjusted rand index between (i) true and netNMF-clusters (red), (ii) true and iCluster-clusters (blue) and (iii) netNMF-clusters and iCluster-clusters (green). Fourth and fifth rows represent the plot of *purity* and *entropy* for netNMF (red) and iCluster (blue).

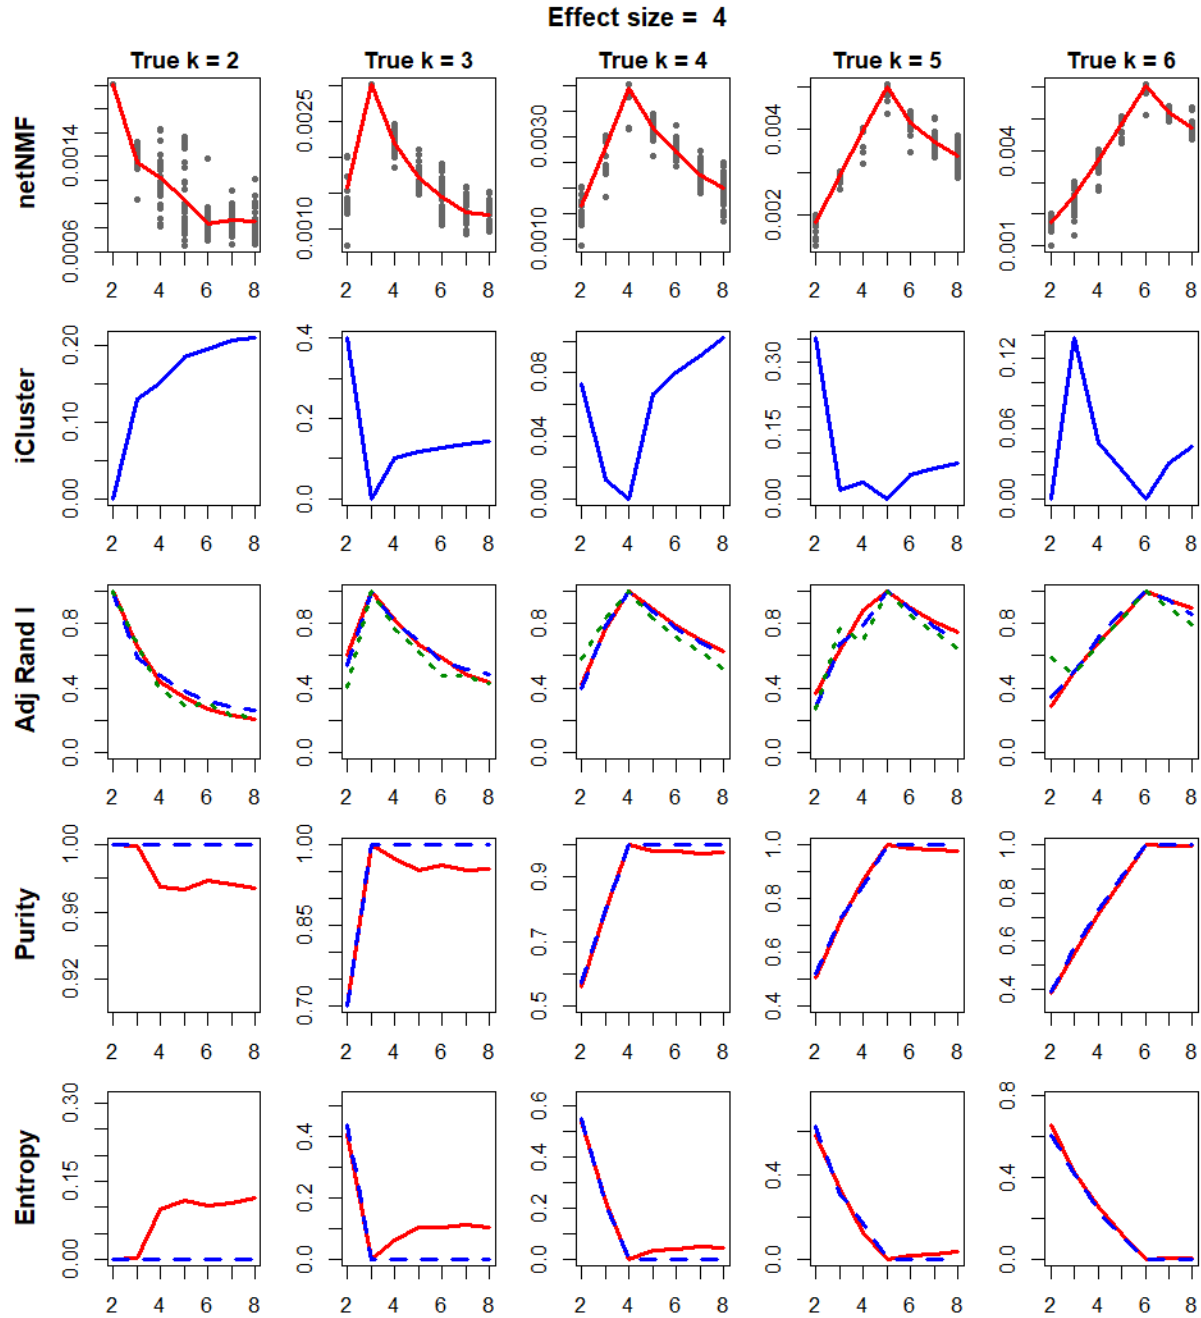

**Fig. S22: Comparison of netNMF and iCluster over varying k and effect size = 4.0.** First row represents the Silhouette width for netNMF, second row represents Proportion of Deviance (POD) for iCluster method. The third row represents adjusted rand index between (i) true and netNMF-clusters (red), (ii) true and iCluster-clusters (blue) and (iii) netNMF-clusters and iCluster-clusters (green). Fourth and fifth rows represent the plot of *purity* and *entropy* for netNMF (red) and iCluster (blue).

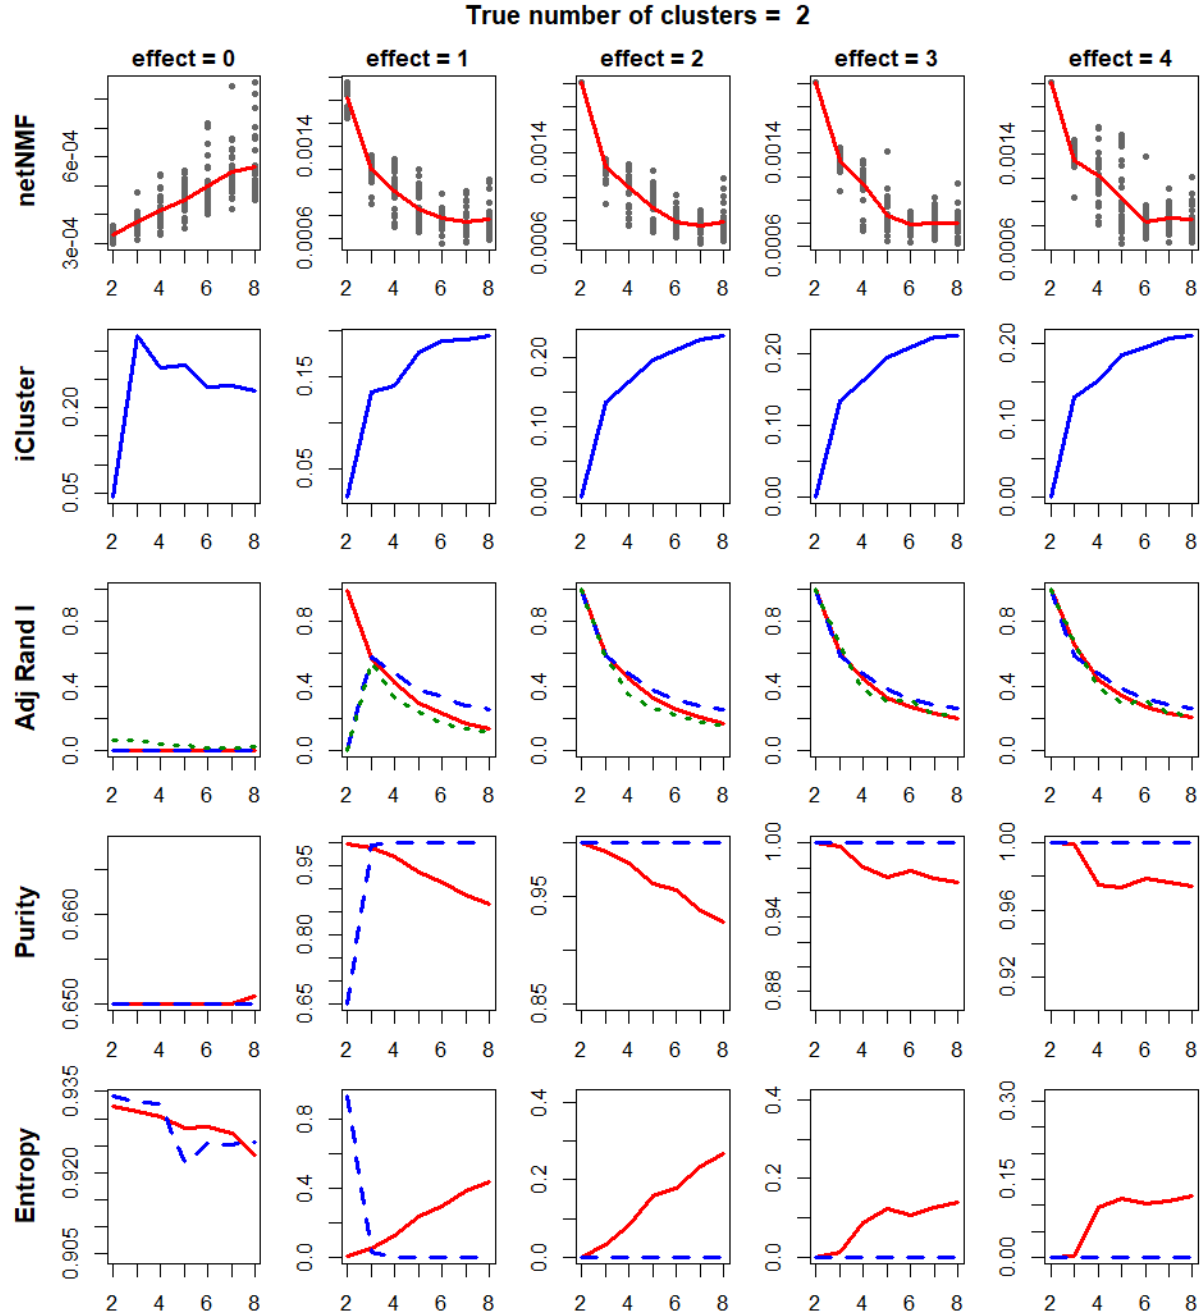

**Fig. S23: Comparison of netNMF and iCluster over varying effect size and  $k = 2$ .** First row represents the Silhouette width for netNMF, second row represents Proportion of Deviance (POD) for iCluster method. The third row represents adjusted rand index between (i) true and netNMF-clusters (red), (ii) true and iCluster-clusters (blue) and (iii) netNMF-clusters and iCluster-clusters (green). Fourth and fifth rows represent the plot of *purity* and *entropy* for netNMF (red) and iCluster (blue).

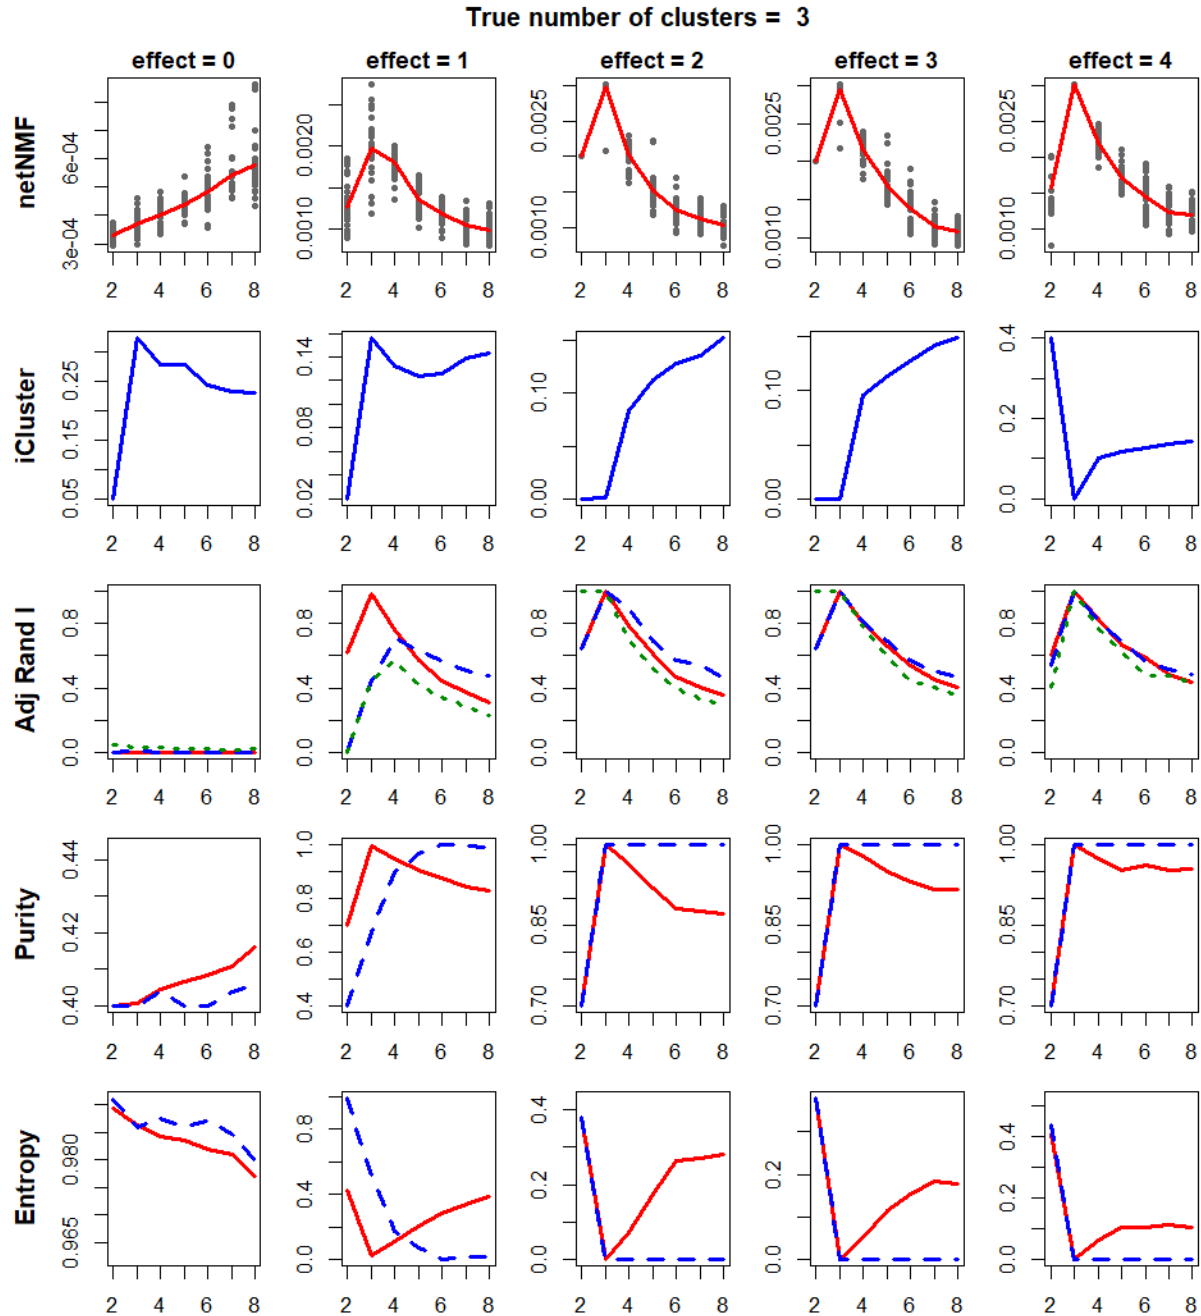

**Fig. S24: Comparison of netNMF and iCluster over varying effect size and  $k = 3$ .** First row represents the Silhouette width for netNMF, second row represents Proportion of Deviance (POD) for iCluster method. The third row represents adjusted rand index between (i) true and netNMF-clusters (red), (ii) true and iCluster-clusters (blue) and (iii) netNMF-clusters and iCluster-clusters (green). Fourth and fifth rows represent the plot of *purity* and *entropy* for netNMF (red) and iCluster (blue).



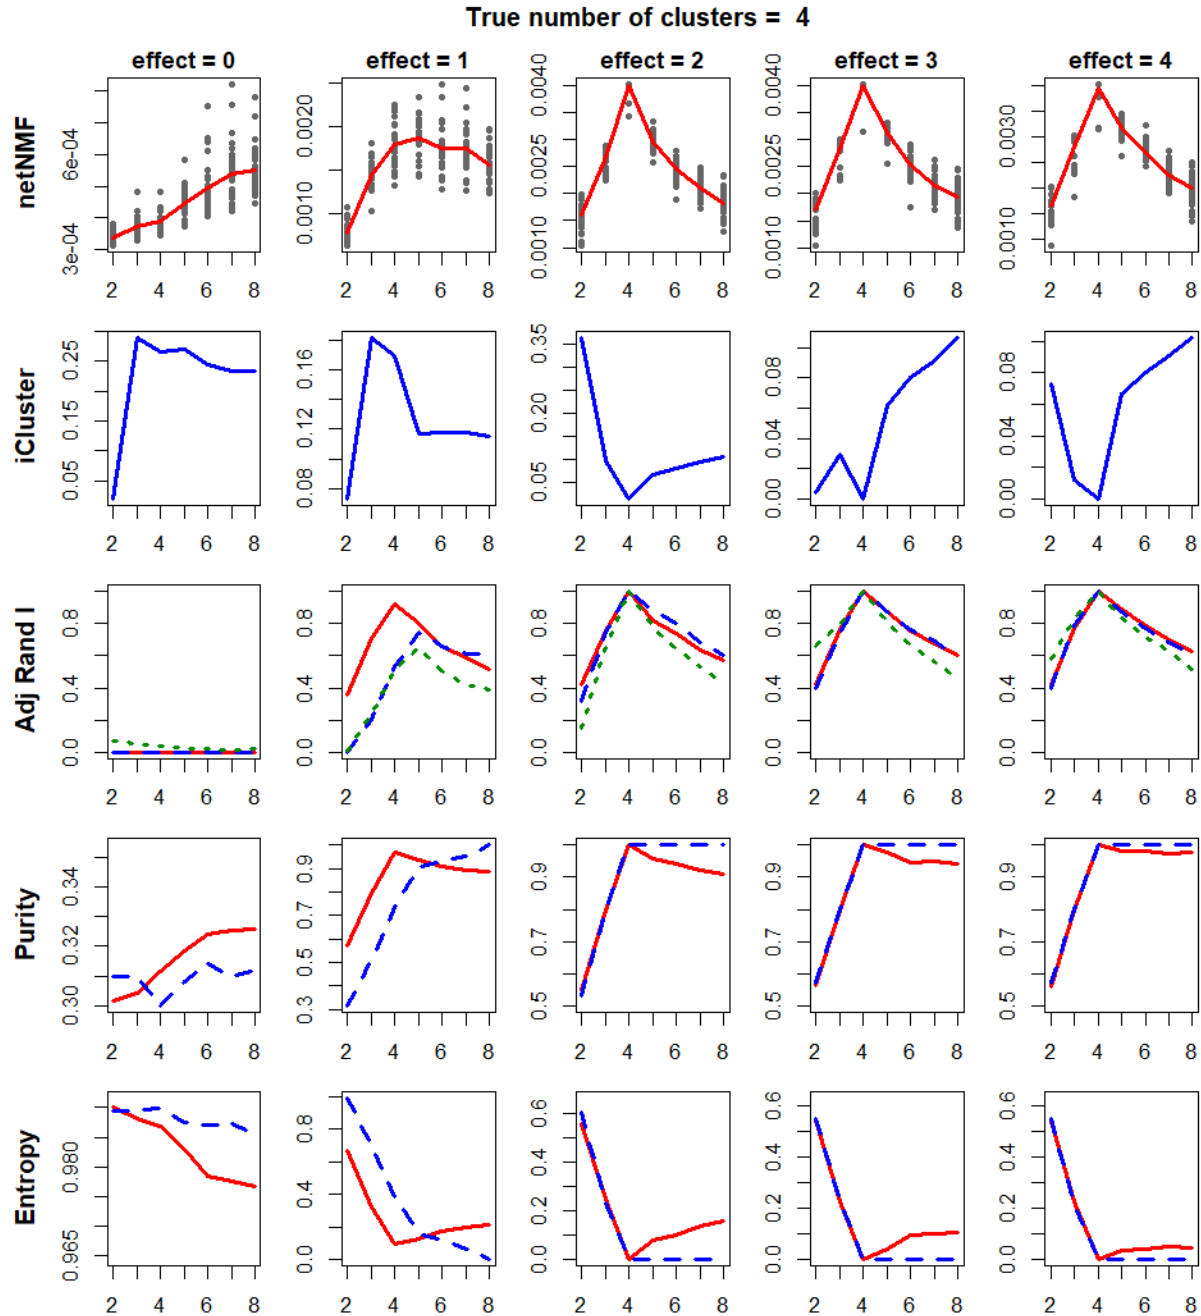

**Fig. S25: Comparison of netNMF and iCluster over varying effect size and  $k = 4$ .** First row represents the Silhouette width for netNMF, second row represents Proportion of Deviance (POD) for iCluster method. The third row represents adjusted rand index between (i) true and netNMF-clusters (red), (ii) true and iCluster-clusters (blue) and (iii) netNMF-clusters and iCluster-clusters (green). Fourth and fifth rows represent the plot of *purity* and *entropy* for netNMF (red) and iCluster (blue).

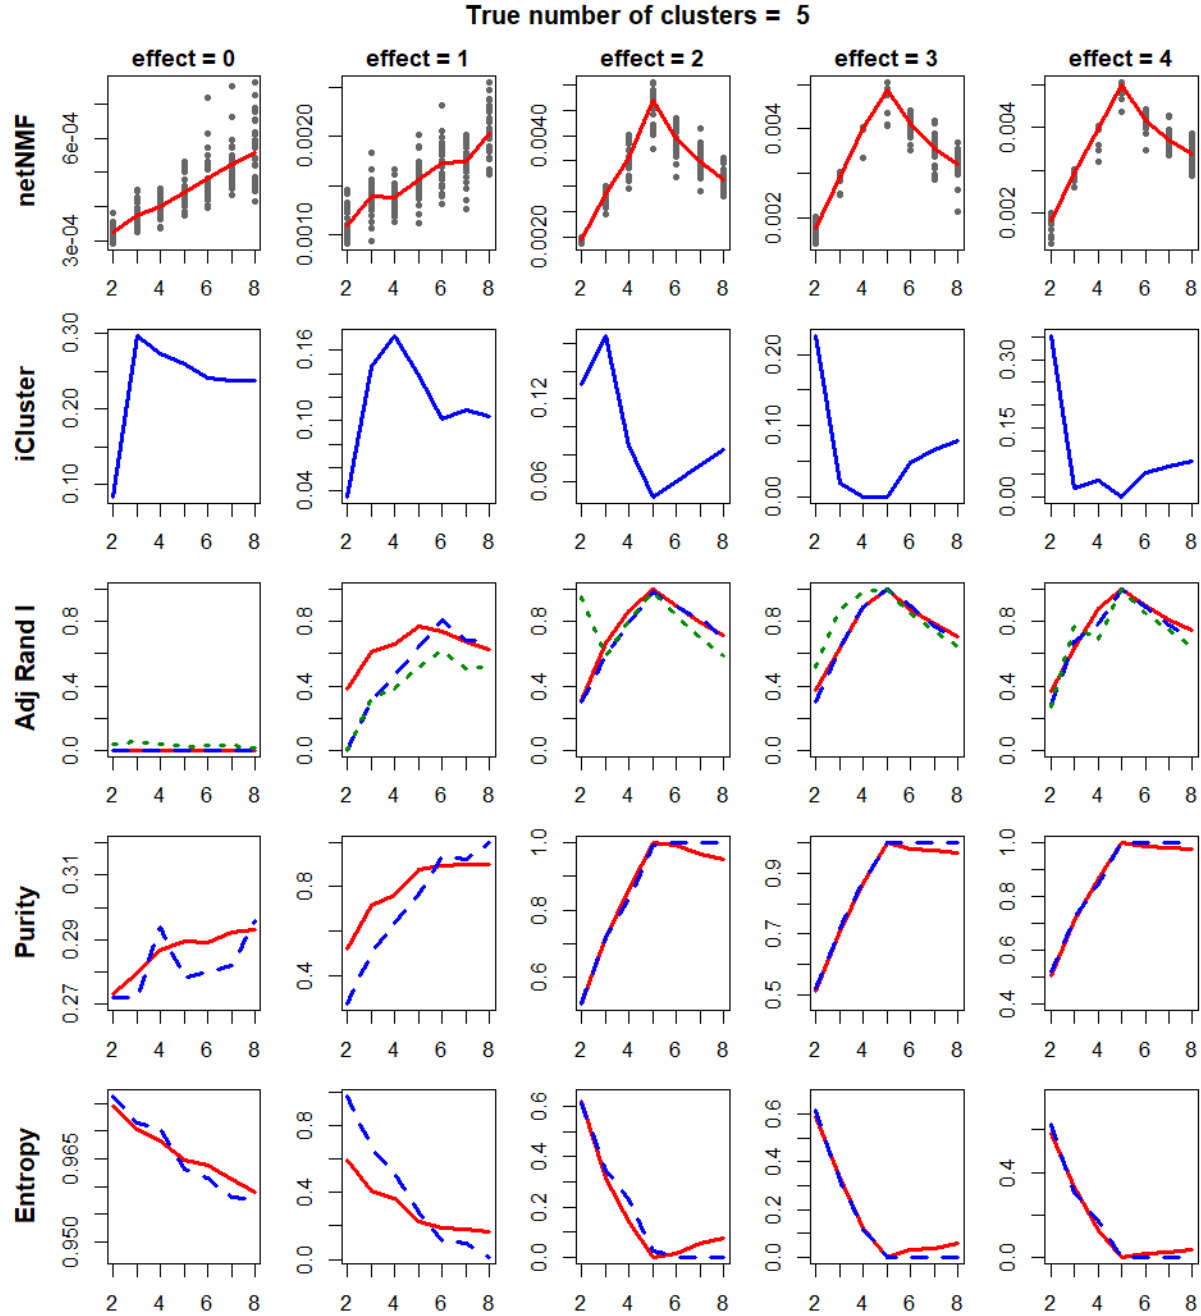

**Fig. S26: Comparison of netNMF and iCluster over varying effect size and  $k = 5$ .** First row represents the Silhouette width for netNMF, second row represents Proportion of Deviance (POD) for iCluster method. The third row represents adjusted rand index between (i) true and netNMF-clusters (red), (ii) true and iCluster-clusters (blue) and (iii) netNMF-clusters and iCluster-clusters (green). Fourth and fifth rows represent the plot of *purity* and *entropy* for netNMF (red) and iCluster (blue).

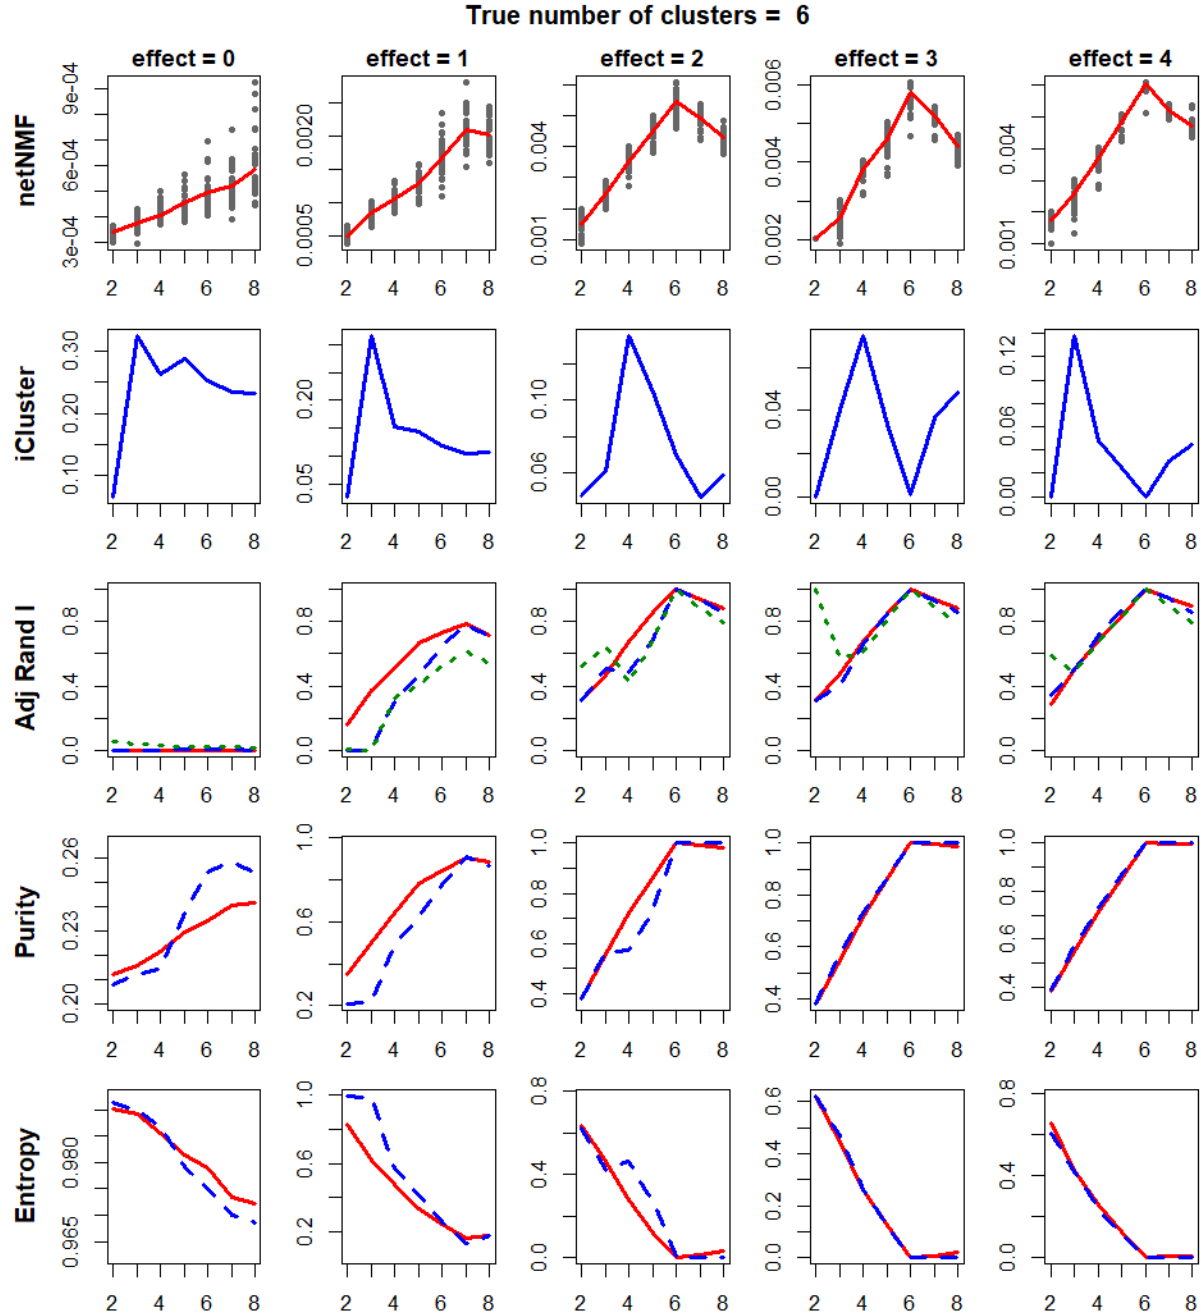

**Fig. S27: Comparison of netNMF and iCluster over varying effect size and  $k = 6$ .** First row represents the Silhouette width for netNMF, second row represents Proportion of Deviance (POD) for iCluster method. The third row represents adjusted rand index between (i) true and netNMF-clusters (red), (ii) true and iCluster-clusters (blue) and (iii) netNMF-clusters and iCluster-clusters (green). Fourth and fifth rows represent the plot of *purity* and *entropy* for netNMF (red) and iCluster (blue).

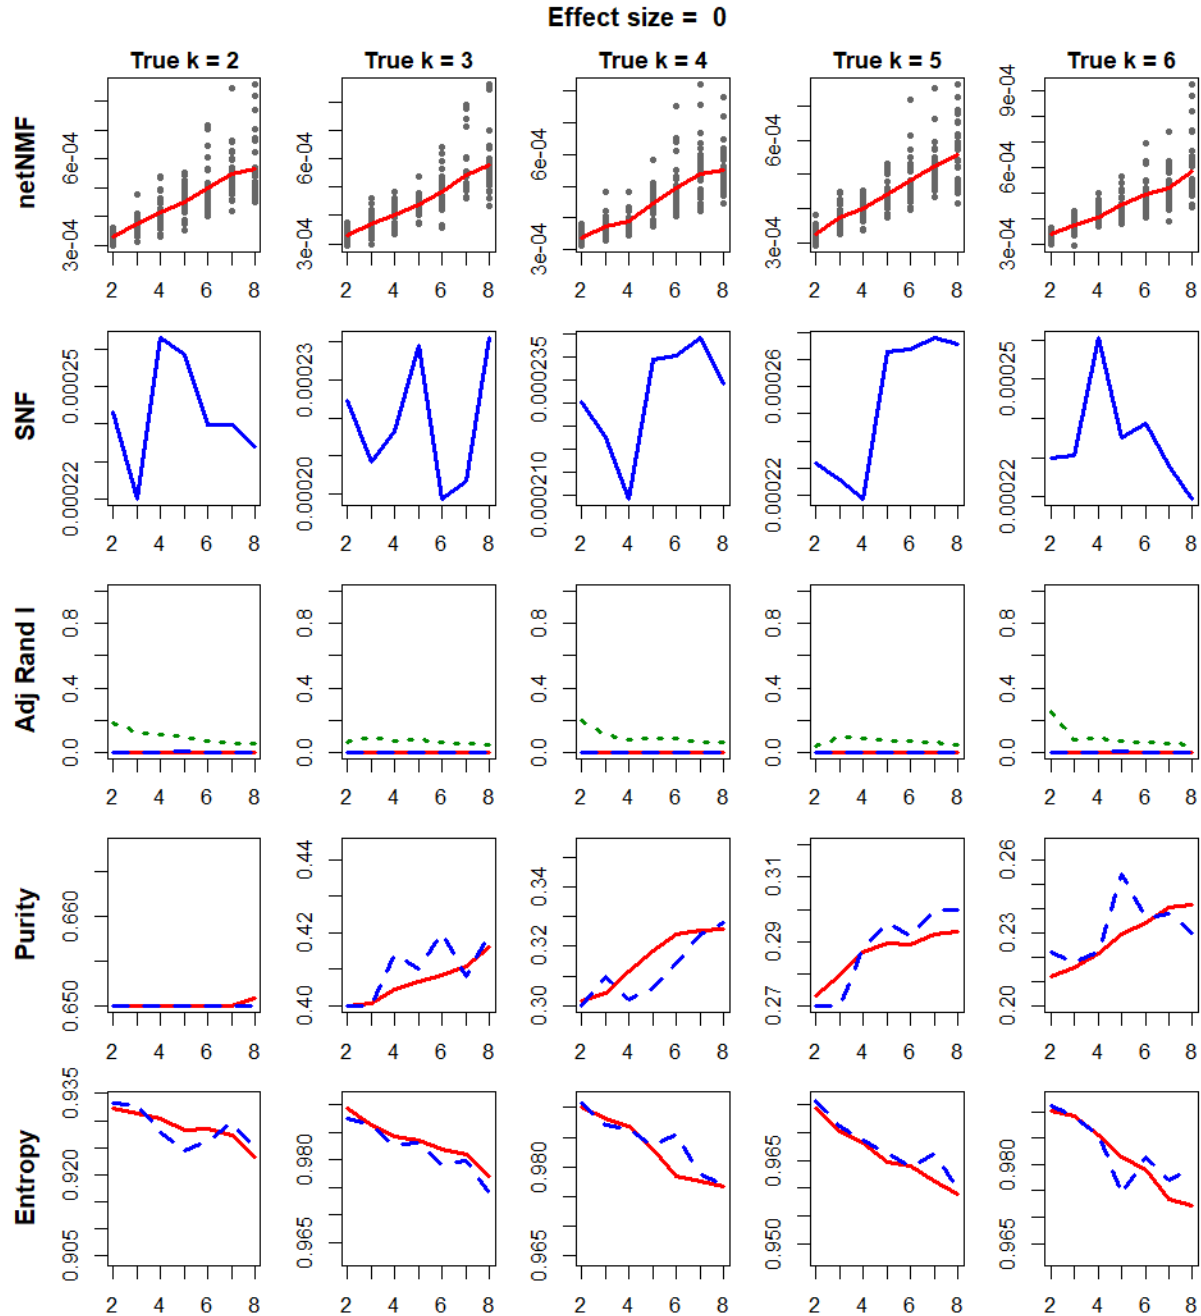

**Fig. S28: Comparison of netNMF and SNF over varying  $k$  and effect size = 0.** First row represents the Silhouette width for netNMF, second row represents Silhouette width for SNF method. The third row represents adjusted rand index between (i) true and netNMF-clusters (red), (ii) true and SNF-clusters (blue) and (iii) netNMF-clusters and SNF-clusters (green). Fourth and fifth rows represent the plot of *purity* and *entropy* for netNMF (red) and SNF (blue).

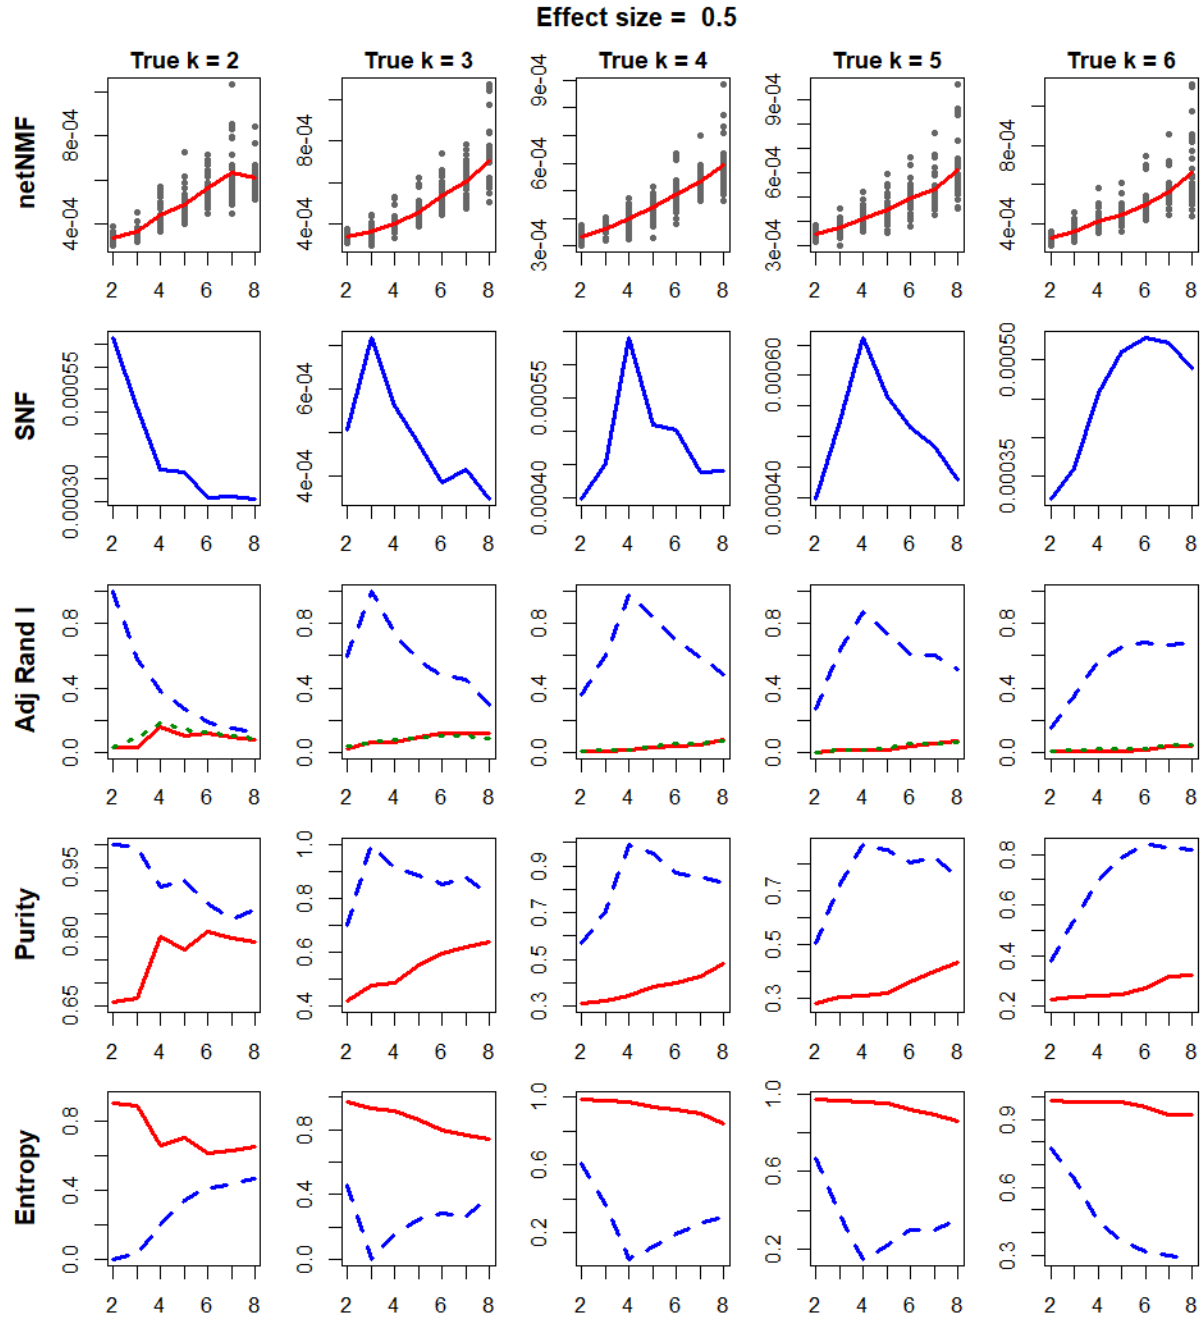

**Fig. S29: Comparison of netNMF and SNF over varying  $k$  and effect size = 0.5.** First row represents the Silhouette width for netNMF, second row represents Silhouette width for SNF method. The third row represents adjusted rand index between (i) true and netNMF-clusters (red), (ii) true and SNF-clusters (blue) and (iii) netNMF-clusters and SNF-clusters (green). Fourth and fifth rows represent the plot of *purity* and *entropy* for netNMF (red) and SNF (blue).

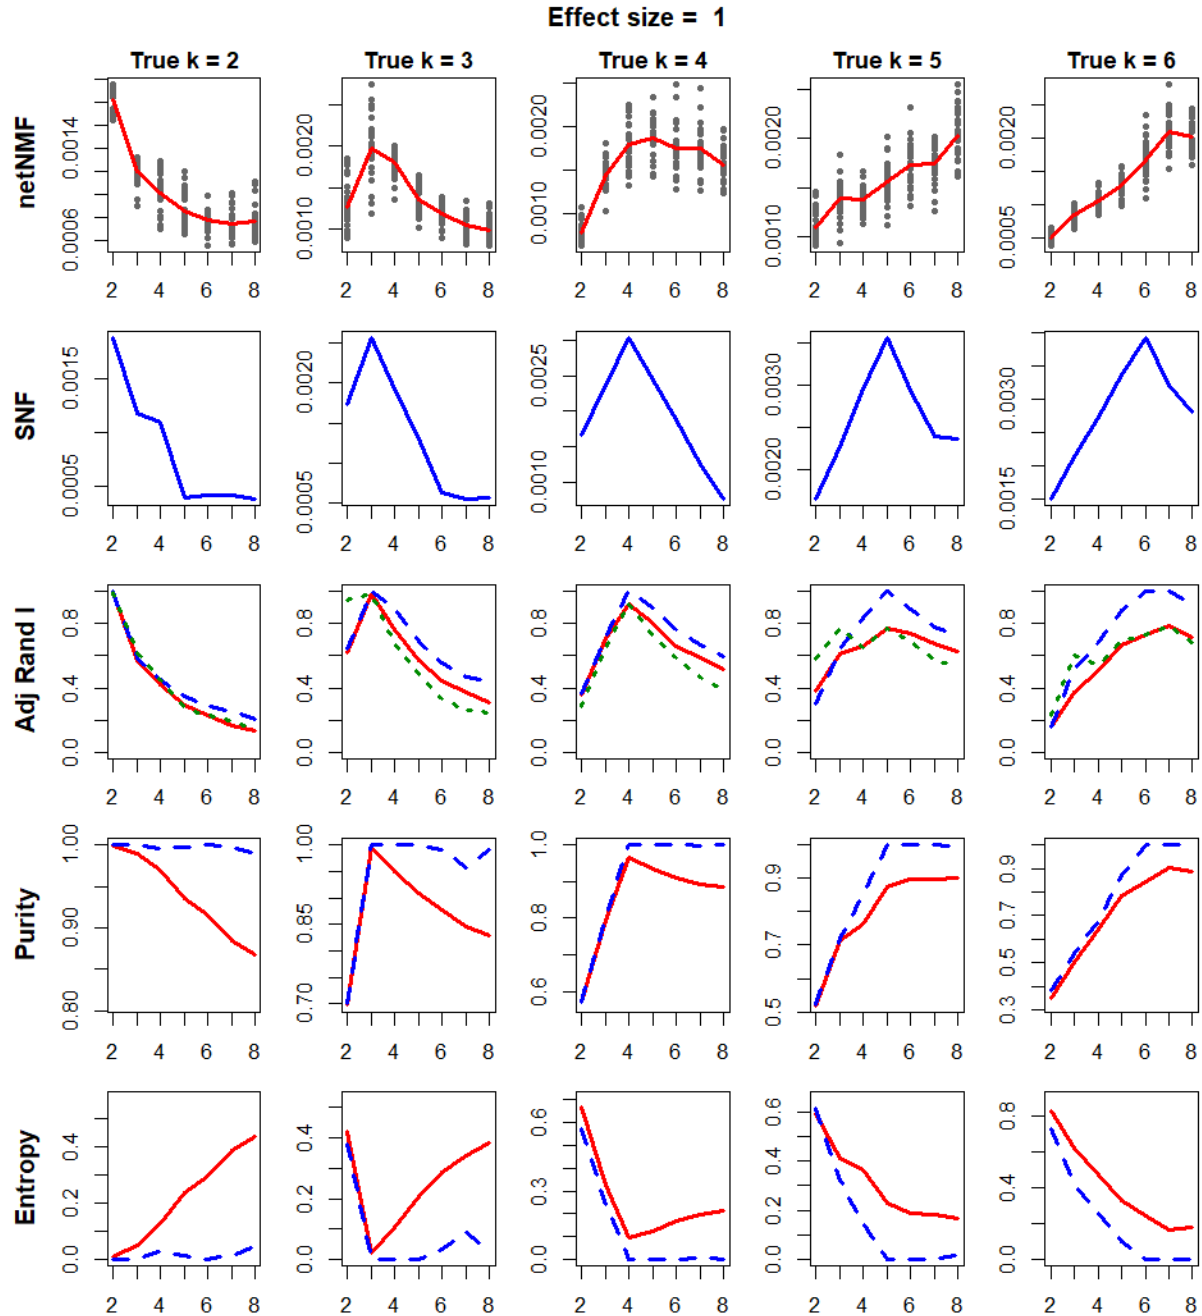

**Fig. S30: Comparison of netNMF and SNF over varying  $k$  and effect size = 1.0.** First row represents the Silhouette width for netNMF, second row represents Silhouette width for SNF method. The third row represents adjusted rand index between (i) true and netNMF-clusters (red), (ii) true and SNF-clusters (blue) and (iii) netNMF-clusters and SNF-clusters (green). Fourth and fifth rows represent the plot of *purity* and *entropy* for netNMF (red) and SNF (blue).

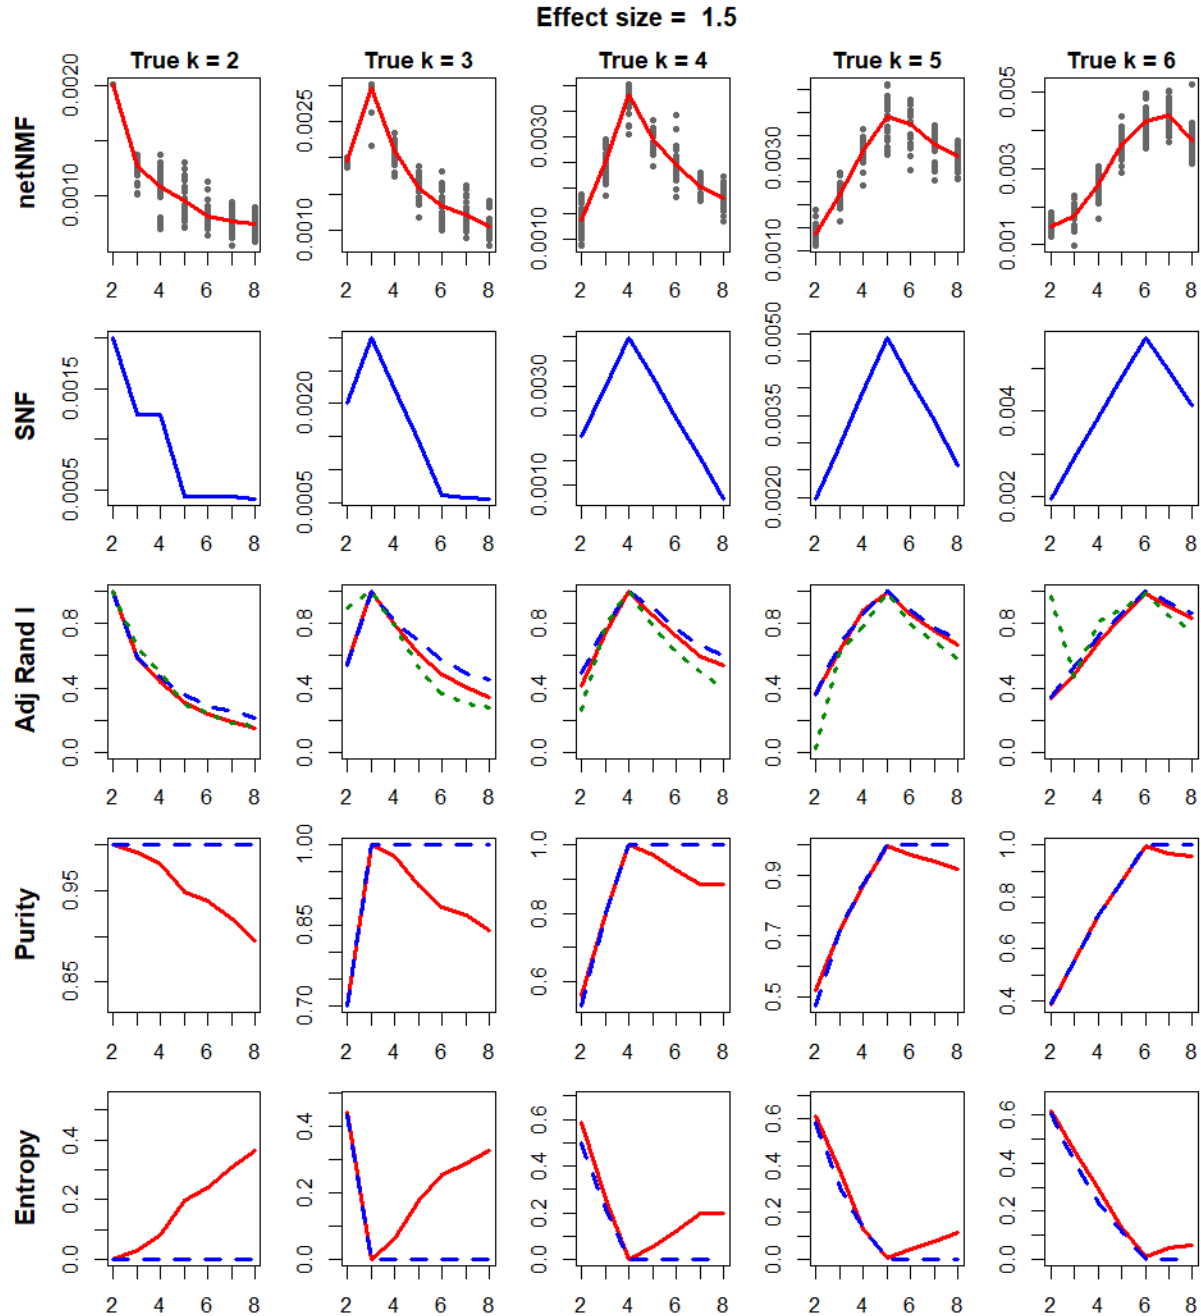

**Fig. S31: Comparison of netNMF and SNF over varying  $k$  and effect size = 1.5.** First row represents the Silhouette width for netNMF, second row represents Silhouette width for SNF method. The third row represents adjusted rand index between (i) true and netNMF-clusters (red), (ii) true and SNF-clusters (blue) and (iii) netNMF-clusters and SNF-clusters (green). Fourth and fifth rows represent the plot of *purity* and *entropy* for netNMF (red) and SNF (blue).

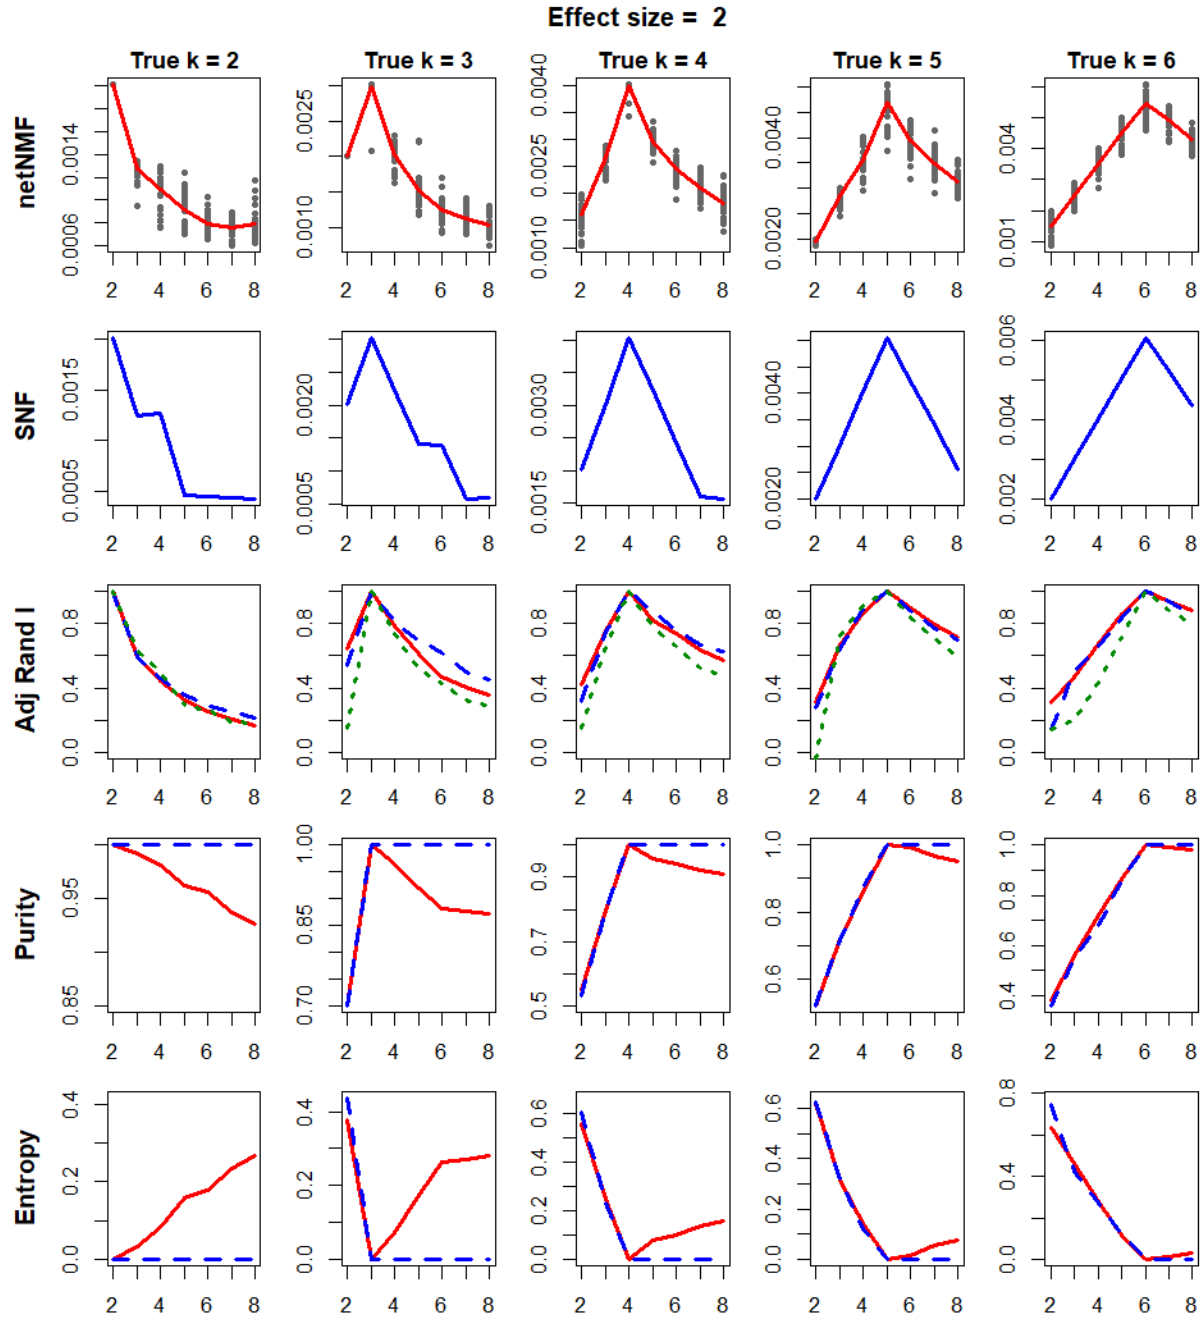

**Fig. S32: Comparison of netNMF and SNF over varying  $k$  and effect size = 2.0.** First row represents the Silhouette width for netNMF, second row represents Silhouette width for SNF method. The third row represents adjusted rand index between (i) true and netNMF-clusters (red), (ii) true and SNF-clusters (blue) and (iii) netNMF-clusters and SNF-clusters (green). Fourth and fifth rows represent the plot of *purity* and *entropy* for netNMF (red) and SNF (blue).



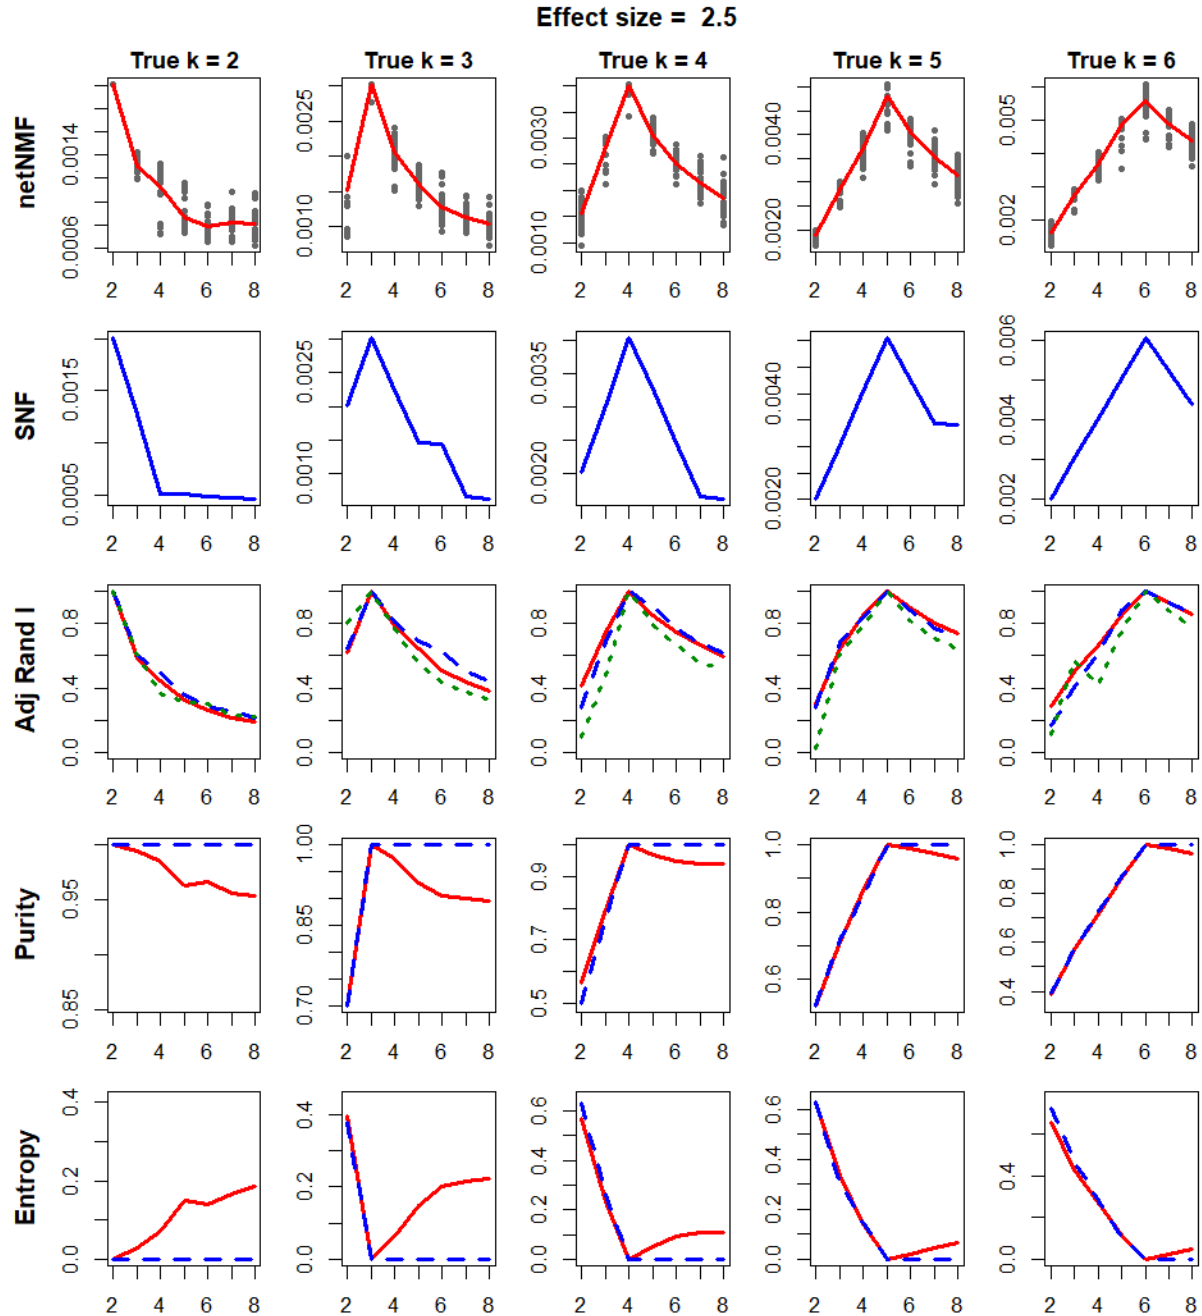

**Fig. S33: Comparison of netNMF and SNF over varying  $k$  and effect size = 2.5.** First row represents the Silhouette width for netNMF, second row represents Silhouette width for SNF method. The third row represents adjusted rand index between (i) true and netNMF-clusters (red), (ii) true and SNF-clusters (blue) and (iii) netNMF-clusters and SNF-clusters (green). Fourth and fifth rows represent the plot of *purity* and *entropy* for netNMF (red) and SNF (blue).

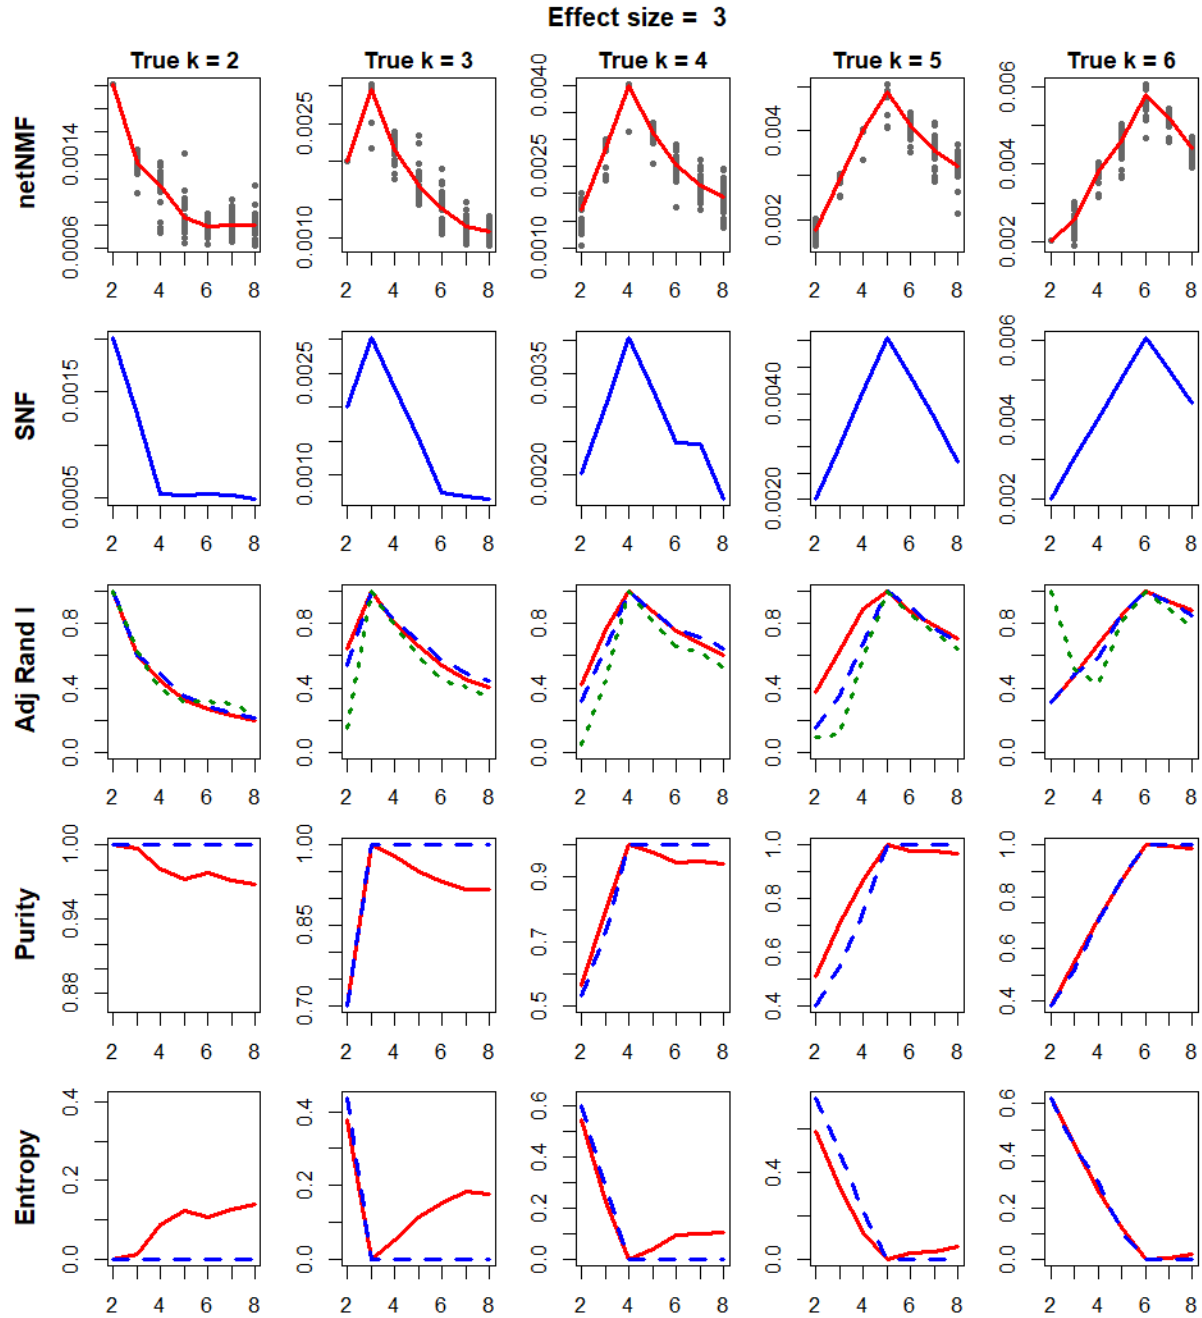

**Fig. S34: Comparison of netNMF and SNF over varying  $k$  and effect size = 3.0.** First row represents the Silhouette width for netNMF, second row represents Silhouette width for SNF method. The third row represents adjusted rand index between (i) true and netNMF-clusters (red), (ii) true and SNF-clusters (blue) and (iii) netNMF-clusters and SNF-clusters (green). Fourth and fifth rows represent the plot of *purity* and *entropy* for netNMF (red) and SNF (blue).

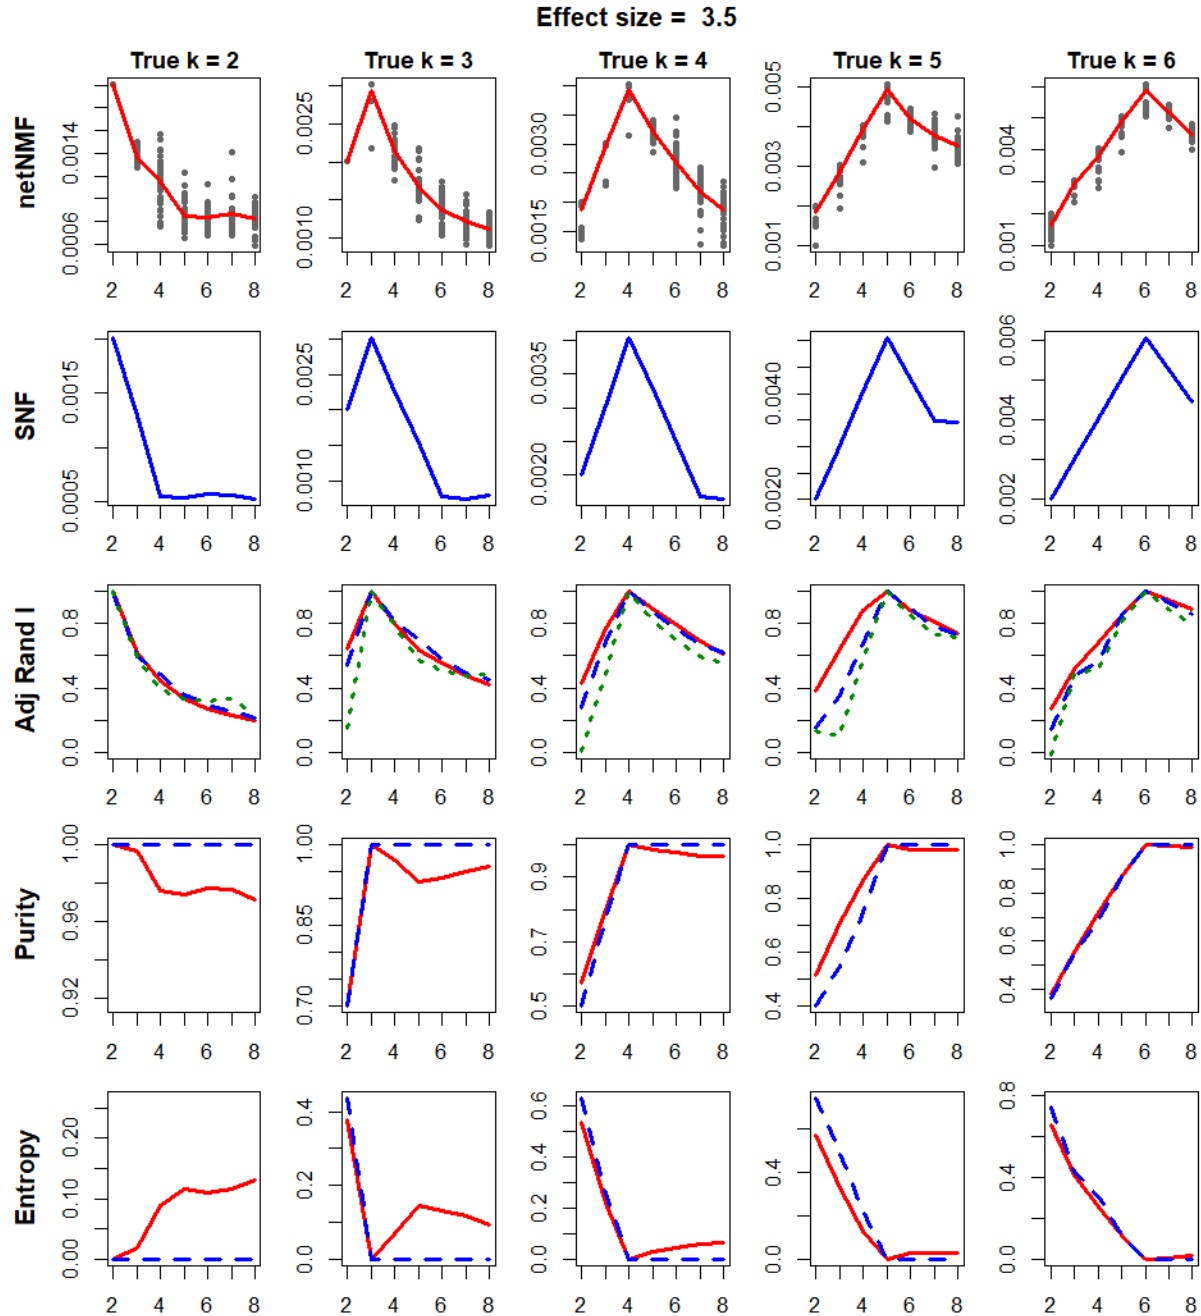

**Fig. S35: Comparison of netNMF and SNF over varying  $k$  and effect size = 3.5.** First row represents the Silhouette width for netNMF, second row represents Silhouette width for SNF method. The third row represents adjusted rand index between (i) true and netNMF-clusters (red), (ii) true and SNF-clusters (blue) and (iii) netNMF-clusters and SNF-clusters (green). Fourth and fifth rows represent the plot of *purity* and *entropy* for netNMF (red) and SNF (blue).

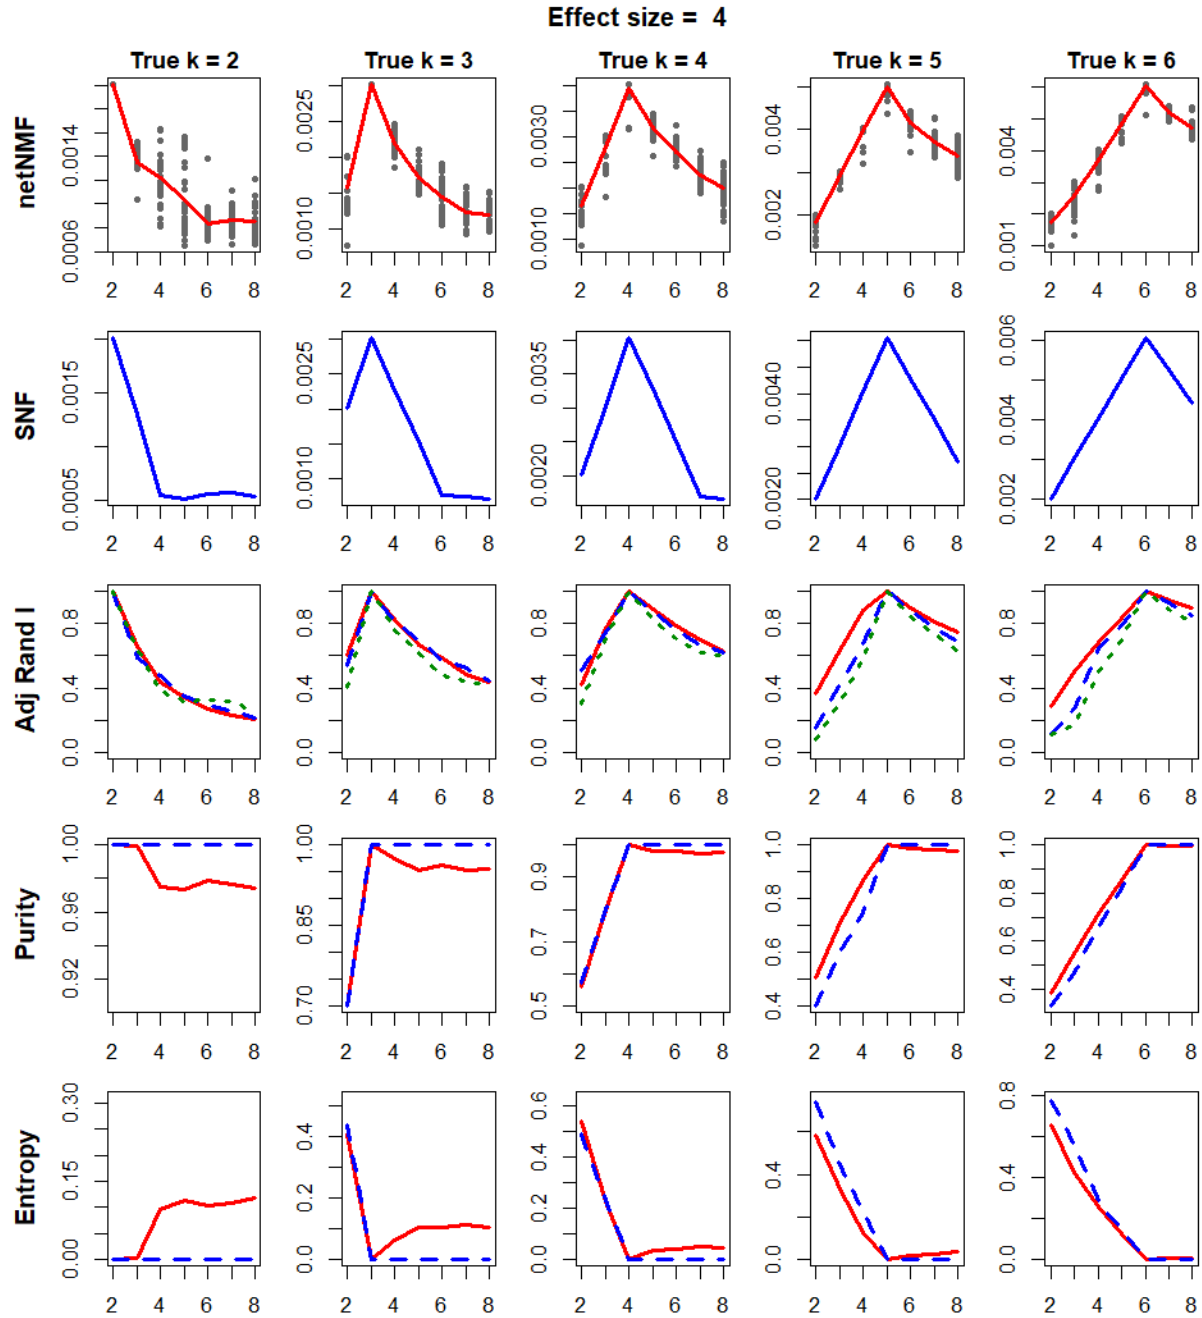

**Fig. S36: Comparison of netNMF and SNF over varying  $k$  and effect size = 4.0.** First row represents the Silhouette width for netNMF, second row represents Silhouette width for SNF method. The third row represents adjusted rand index between (i) true and netNMF-clusters (red), (ii) true and SNF-clusters (blue) and (iii) netNMF-clusters and SNF-clusters (green). Fourth and fifth rows represent the plot of *purity* and *entropy* for netNMF (red) and SNF (blue).

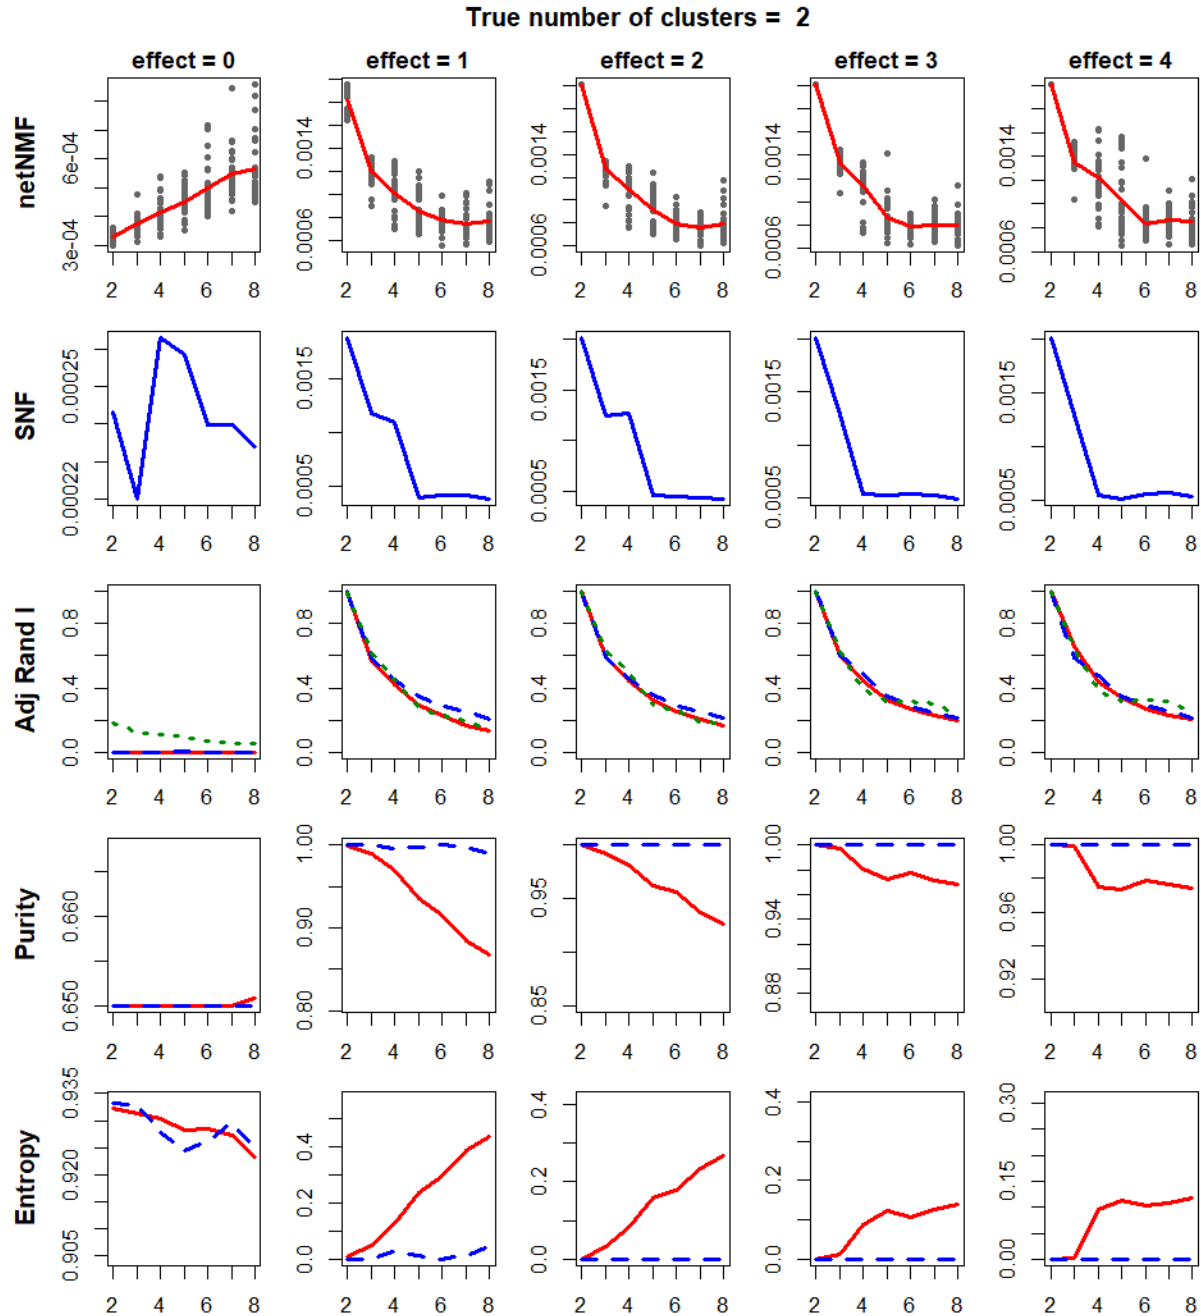

**Fig. S37: Comparison of netNMF and SNF over varying effect size and  $k = 2$ .** First row represents the Silhouette width for netNMF, second row represents Silhouette width for SNF method. The third row represents adjusted rand index between (i) true and netNMF-clusters (red), (ii) true and SNF-clusters (blue) and (iii) netNMF-clusters and SNF-clusters (green). Fourth and fifth rows represent the plot of *purity* and *entropy* for netNMF (red) and SNF (blue).

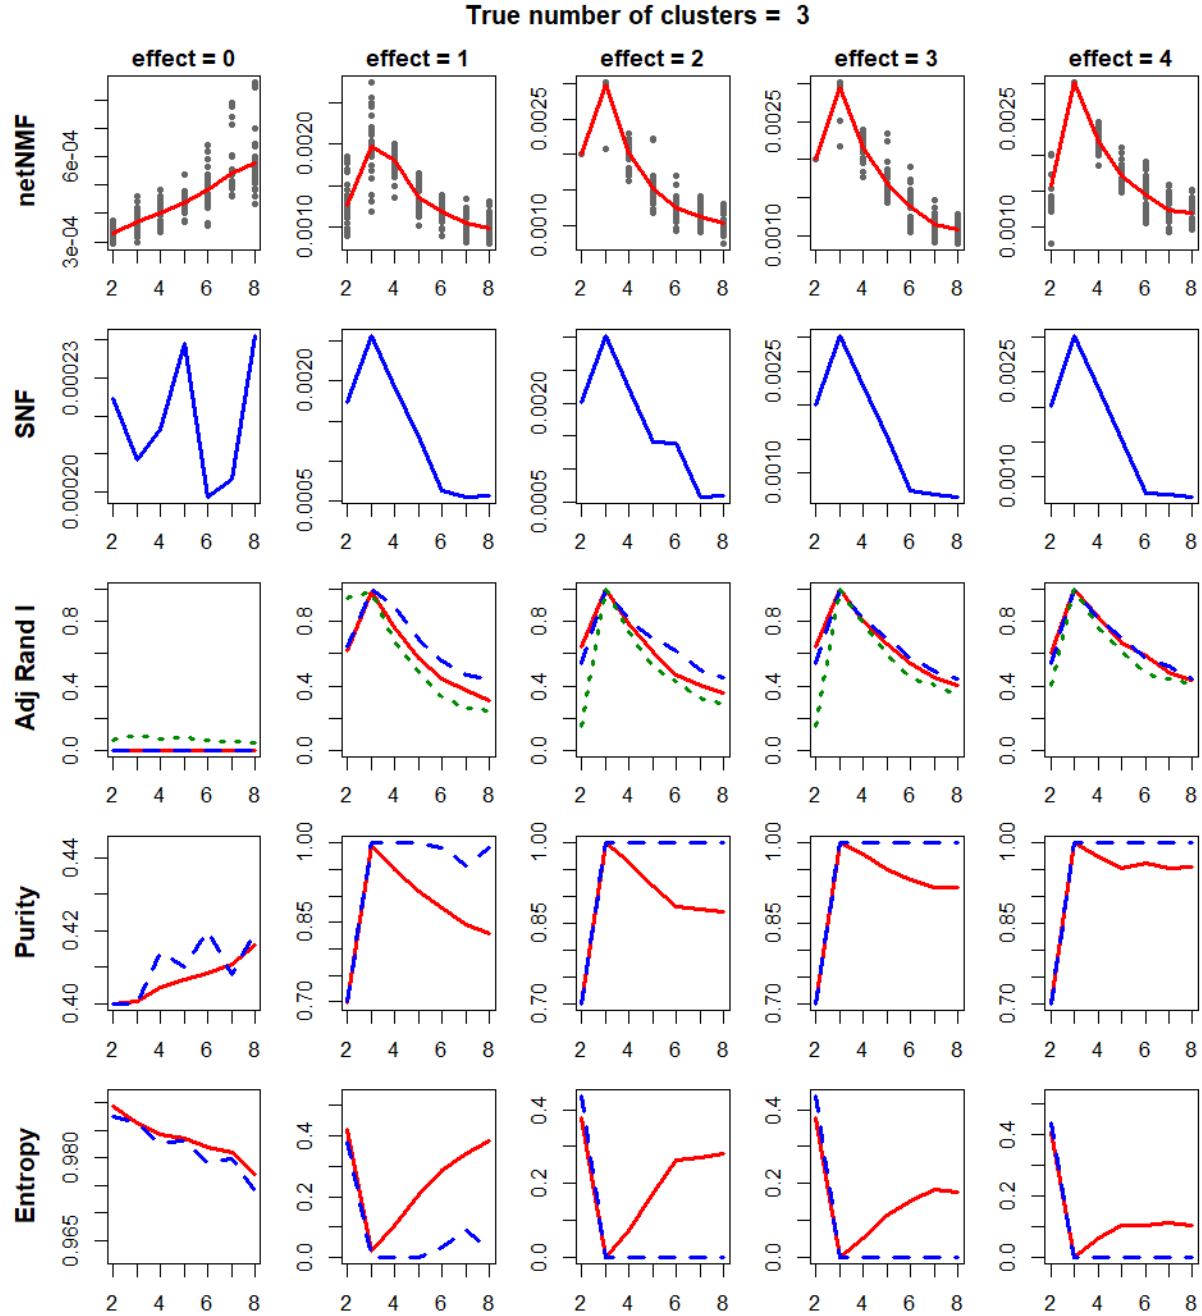

**Fig. S38: Comparison of netNMF and SNF over varying effect size and  $k = 3$ .** First row represents the Silhouette width for netNMF, second row represents Silhouette width for SNF method. The third row represents adjusted rand index between (i) true and netNMF-clusters (red), (ii) true and SNF-clusters (blue) and (iii) netNMF-clusters and SNF-clusters (green). Fourth and fifth rows represent the plot of *purity* and *entropy* for netNMF (red) and SNF (blue).

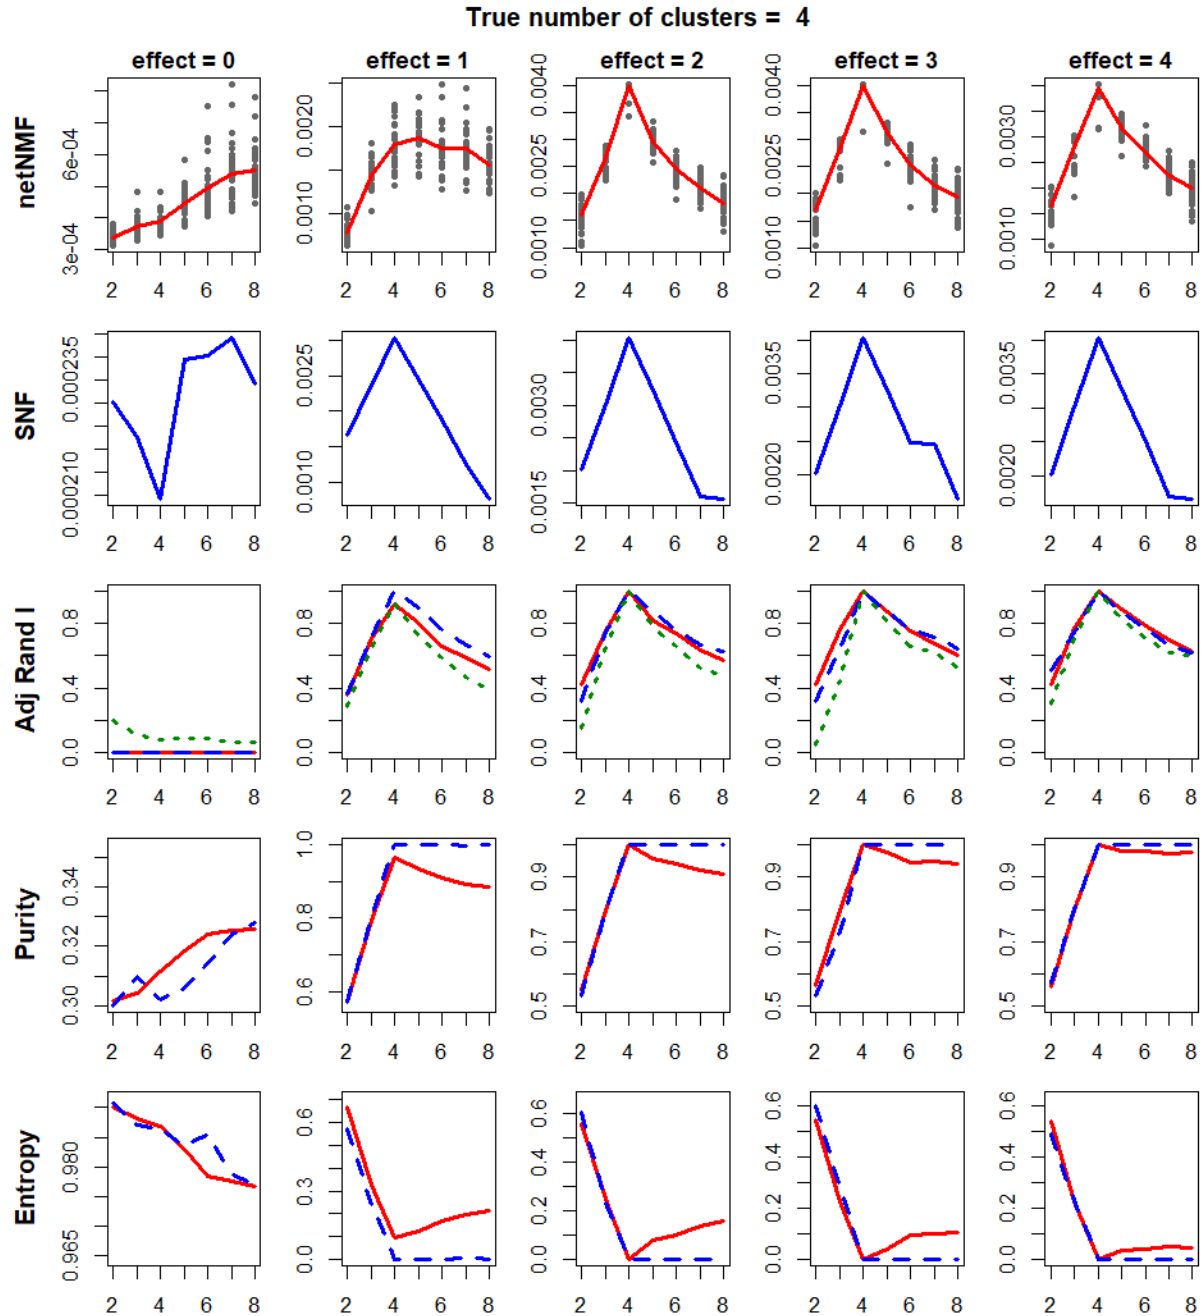

**Fig. S39: Comparison of netNMF and SNF over varying effect size and  $k = 4$ .** First row represents the Silhouette width for netNMF, second row represents Silhouette width for SNF method. The third row represents adjusted rand index between (i) true and netNMF-clusters (red), (ii) true and SNF-clusters (blue) and (iii) netNMF-clusters and SNF-clusters (green). Fourth and fifth rows represent the plot of *purity* and *entropy* for netNMF (red) and SNF (blue).

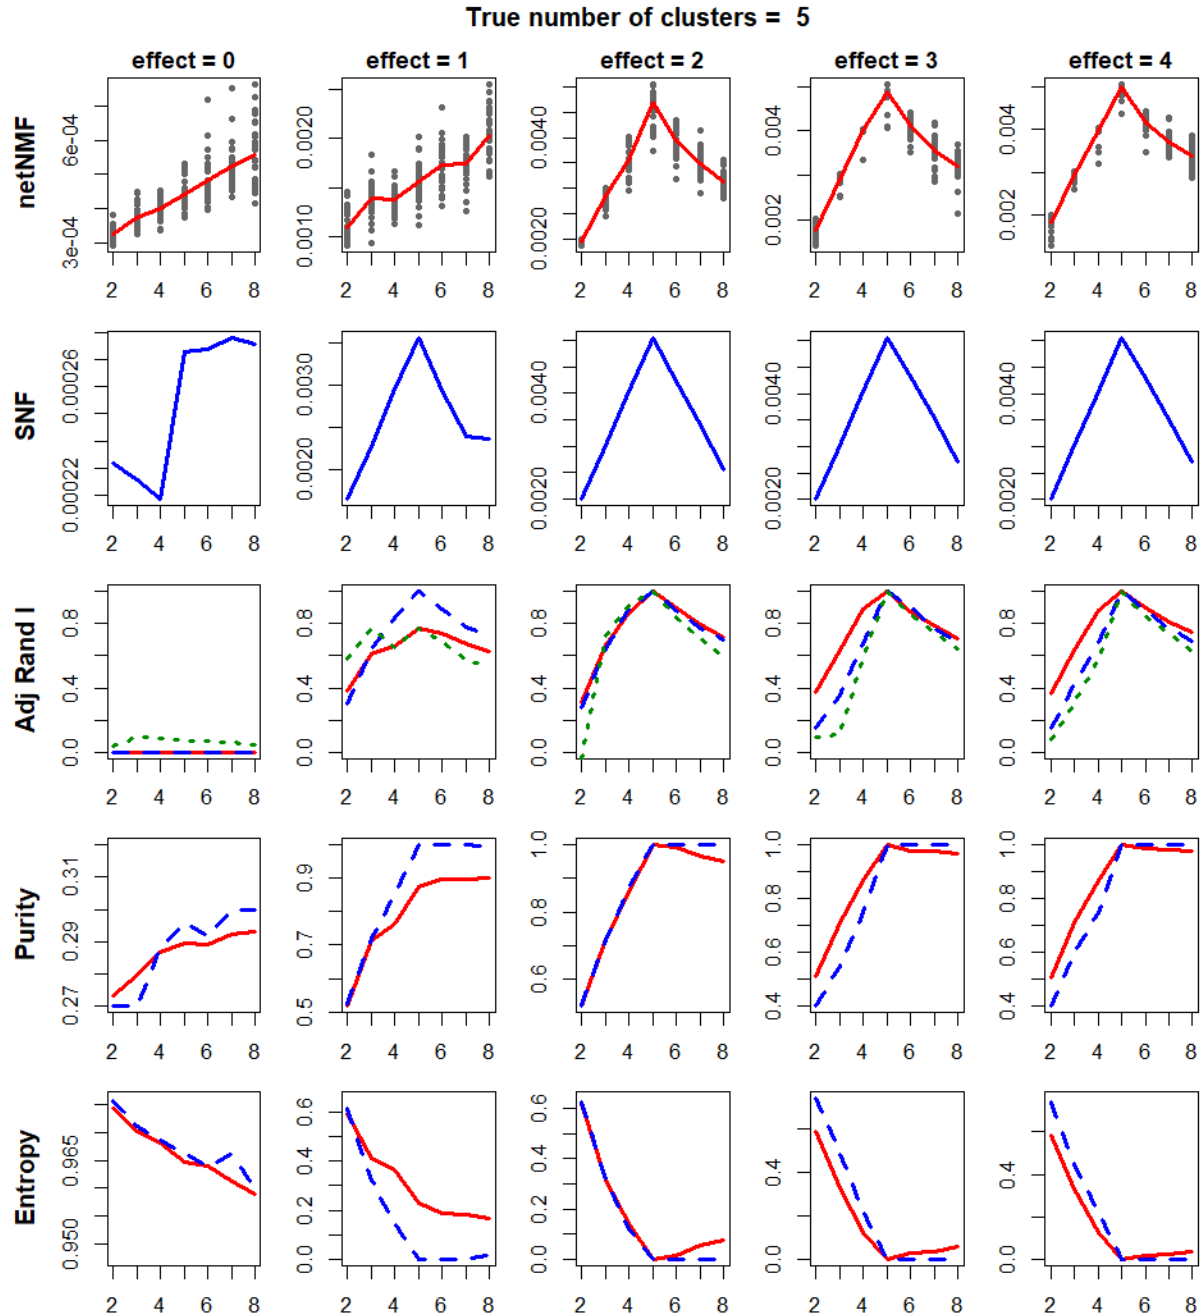

**Fig. S40: Comparison of netNMF and SNF over varying effect size and  $k = 5$ .** First row represents the Silhouette width for netNMF, second row represents Silhouette width for SNF method. The third row represents adjusted rand index between (i) true and netNMF-clusters (red), (ii) true and SNF-clusters (blue) and (iii) netNMF-clusters and SNF-clusters (green). Fourth and fifth rows represent the plot of *purity* and *entropy* for netNMF (red) and SNF (blue).



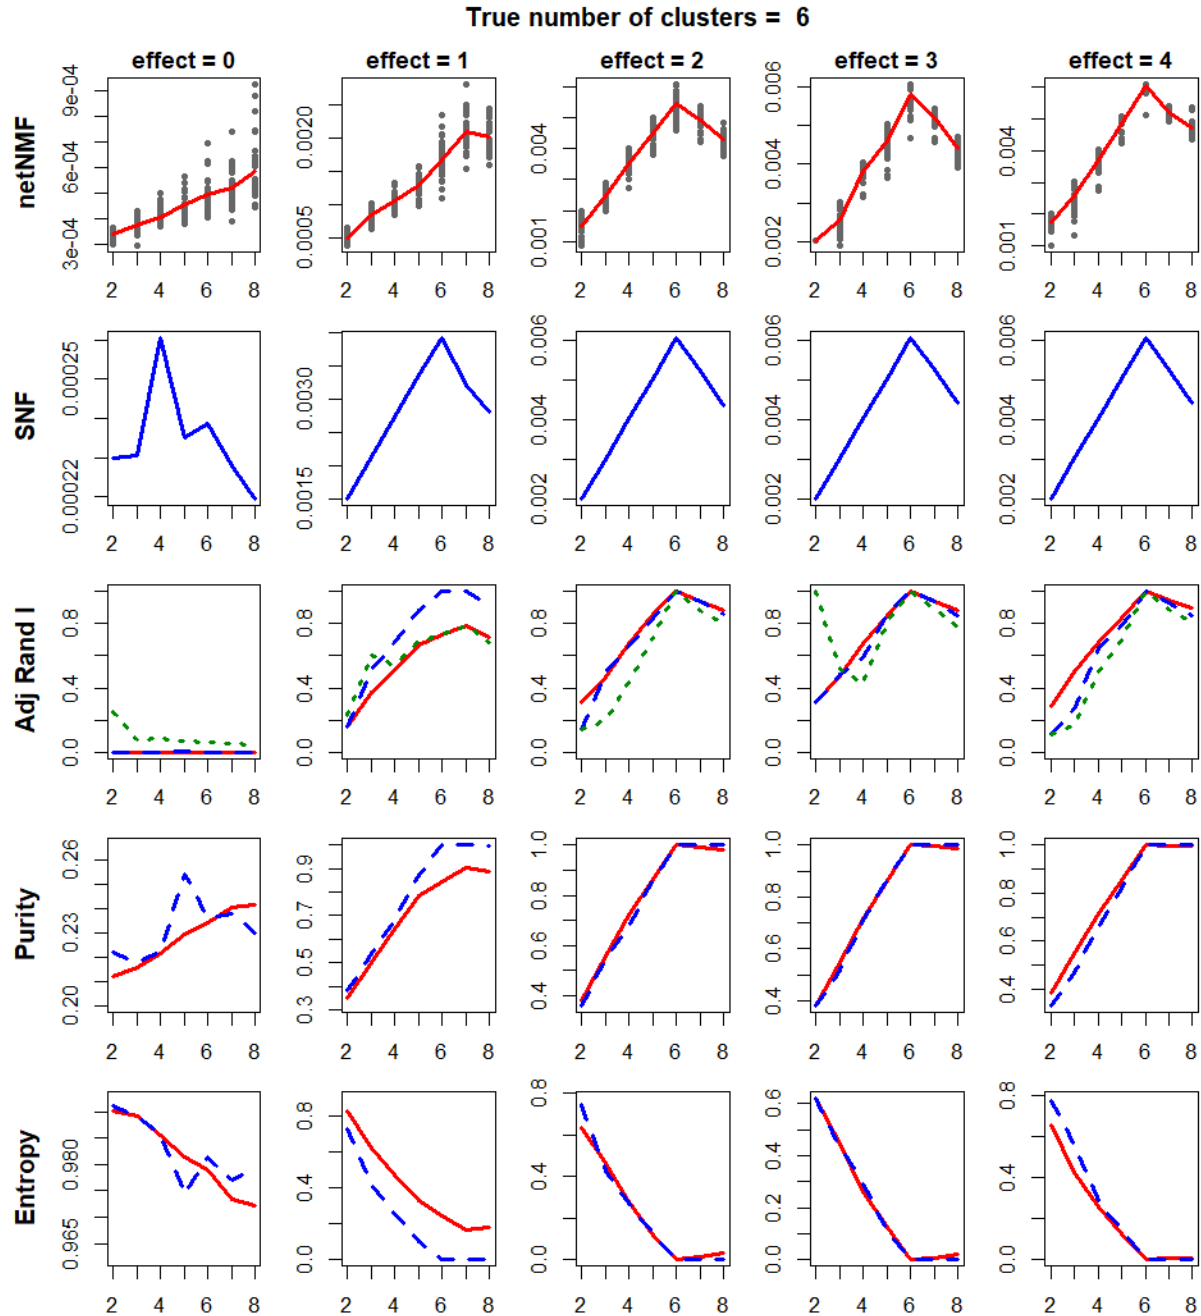

**Fig. S41: Comparison of netNMF and SNF over varying effect size and  $k = 6$ .** First row represents the Silhouette width for netNMF, second row represents Silhouette width for SNF method. The third row represents adjusted rand index between (i) true and netNMF-clusters (red), (ii) true and SNF-clusters (blue) and (iii) netNMF-clusters and SNF-clusters (green). Fourth and fifth rows represent the plot of *purity* and *entropy* for netNMF (red) and SNF (blue).
